# Supplementary material
Source: publisher figshare collection journal article supplement (https://gsajournals.figshare.com/ndownloader/files/25425182)
Supplement: Supplementary file 1 [file 25425182]

**SUPPLEMENTAL TABLES and FIGURES for**

**Reconstructed evolutionary history of the yeast septins Cdc11 and Shs1**

Julie Takagi1,2*, Christina Cho1,3*, Angela Duvalyan1,4*, Yao Yan5, Megan Halloran5,6,

Victor Hanson-Smith7, Jeremy Thorner1 and Gregory C. Finnigan5†

1Department of Molecular and Cell Biology,

University of California, Berkeley, CA 94720-3202; and,

5Department of Biochemistry and Molecular Biophysics,

Kansas State University, Manhattan, KS 66506

Running Title: Septin gene duplication and divergence

2Current Address: Dept. of Biological Engineering, Massachusetts Institute of

Technology, Cambridge, MA 02139 USA

3Current Address: Endodontics Residency Program, College of Dental Medicine,

Columbia University, New York, NY 10032 USA

4Current Address: Dept. of Internal Medicine, Univ. of Texas Southwestern Medical Center,

5323 Harry Hines Blvd., Dallas TX 75390 USA

6Current Address: Dept. of Psychology, University of Kentucky, Lexington, KY 40506 USA

7Current Address: Verge Genomics, Inc., South San Francisco, CA 94080 USA

*These authors contributed equally to this work.

†Correspondence to:

Gregory C. Finnigan

Dept. of Biochemistry & Molecular Biophysics

Kansas State University

141 Chalmers Hall, 1711 Claflin Rd.

Manhattan, KS 66506 USA

Phone: (785) 532-6939; FAX; (785) 532-7278;

E-mail: [gfinnigan@ksu.edu](mailto:gfinnigan@ksu.edu)

**Table S1.** Fungal septins (orthologs of Cdc11 and Shs1) used for ancestral gene reconstruction.

| **Septin Subunit** | **Paralog of Cdc11 or Shs1** | **Length (amino acids)** | **Reference** |
| --- | --- | --- | --- |
| *Saccharomyces cerevisiae* Cdc11 | Cdc11 | 415 | NCBI Ref Seq: NP_012610.1 |
| *Vanderwaltozyma polyspora* hypothetical protein Kpol_1018p187 | Cdc11 | 407 | NCBI Ref Seq: XP_001647505.1 |
| *Candida glabrata* uncharacterized protein CAGL0F00275g | Cdc11 | 404 | NCBI Ref Seq: XP_445986.1 |
| *Candida albicans* septin | Cdc11 | 402 | NCBI Ref Seq: XP_710520.1 |
| *Kluyveromyces lactis* uncharacterized protein KLLA0_B14344g | Cdc11 | 420 | NCBI Ref Seq: XP_452169.1 |
| *Eremothecium gossypii* AER445Cp | Cdc11 | 411 | NCBI Ref Seq: NP_985300.1 |
| *Lachancea thermotolerans* KLTH0B00990p | Cdc11 | 404 | NCBI Ref Seq: XP_002551835.1 |
| *Zygosaccharomyces rouxii* uncharacterized protein ZYRO0G02354g | Cdc11 | 415 | NCBI Ref Seq: XP_002498105.1 |
| *Debaryomyces hansenii* DEHA2B10186p | Cdc11 | 423 | NCBI Ref Seq: XP_457395.2 |
| *Naumovozyma castellii* hypothetical protein NCAS_0G03550 | Cdc11 | 406 | NCBI Ref Seq: XP_003677594.1 |
| *Kazachstania naganishii* hypothetical protein KNAG_0G00160 | Cdc11 | 437 | NCBI Ref Seq: XP_022465321.1 |
| *Candida tropicalis* cell division control protein 11 | Cdc11 | 405 | NCBI Ref Seq: XP_002550931.1 |
| *Lodderomyces elongisporus* cell division control protein 11 | Cdc11 | 461 | NCBI Ref Seq: XP_001524962.1 |
| *Komagataella phaffii* GQ67_04096T0 | Cdc11 | 399a | GenBank: AOA64093.1 |
| *Candida parapsilosis* hypothetical protein CPAR2_502350 | Cdc11 | 476 | GenBank: CCE44010.1 |
| *Millerozyma farinosa* Piso0_002977 | Cdc11 | 420 | GenBank: CCE79885.1 |
| *Candida dubliniensis* septin, putative | Cdc11 | 402 | NCBI Ref Seq: XP_002420317.1 |
| *Saccharomyces cerevisiae* Shs1 | Shs1 | 551 | NCBI Ref Seq: NP_010056.1 |
| *Vanderwaltozyma polyspora* hypothetical protein Kpol_1054p29 | Shs1 | 531 | NCBI Ref Seq: XP_001645840.1 |
| *Candida glabrata* uncharacterized protein CAGL0G05489g | Shs1 | 533 | NCBI Ref Seq: XP_446599.1 |
| *Candida albicans* hypothetical protein CAWG_01160 | Shs1 | 665 | GenBank: EEQ42935.1 |
| *Kluyveromyces lactis* uncharacterized protein KLLA0_F20812g | Shs1 | 551 | NCBI Ref Seq: XP_456014.1 |
| *Eremothecium gossypii* ABL159Wp | Shs1 | 580 | NCBI Ref Seq: NP_982788.1 |
| *Lachancea thermotolerans* KLTH0B07568p | Shs1 | 544 | NCBI Ref Seq: XP_002552116.1 |
| *Zygosaccharomyces rouxii* uncharacterized protein ZYRO0C10186g | Shs1 | 521 | NCBI Ref Seq: XP_002496087.1 |
| *Debaryomyces hansenii* DEHA2C02266p | Shs1 | 590 | NCBI Ref Seq: XP_457779.2 |
| *Naumovozyma castellii* hypothetical protein NCAS_0D00280 | Shs1 | 548 | NCBI Ref Seq: XP_003675973.1 |
| *Kazachstania naganishii* hypothetical protein KNAG_0L02400 | Shs1 | 540 | NCBI Ref Seq: XP_022467099.1 |
| *Candida tropicalis* hypothetical protein CTRG_04647 | Shs1 | 610 | NCBI Ref Seq: XP_002550349.1 |
| *Lodderomyces elongisporus* hypothetical protein LELG_01630 | Shs1 | 624 | NCBI Ref Seq: XP_001526802.1 |
| *Komagataella phaffii* One of five related septins | Shs1 | 539 | NCBI Ref Seq: XP_002493220.1 |
| *Candida parapsilosis* hypothetical protein CPAR2_106220 | Shs1 | 618 | GenBank: CCE40587.1 |
| *Millerozyma farinosa* Piso0_002834 | Shs1 | 573 | GenBank: CCE83059.1 |
| *Candida dubliniensis* septin, putative | Shs1 | 585 | NCBI Ref Seq: XP_002416881.1 |
| *Cryptococcus neoformans* septin, putative | Both | 390 | NCBI Ref Seq: XP_570909.1 |
| *Ustilago maydis* septin 3 | Both | 359 | NCBI Ref Seq: XP_011389909.1 |
| *Schizosaccharomyces pombe* septin Spn3 | Both | 412 | NCBI Ref Seq: NP_001342704.1 |
| *Neurospora crassa* Septin | Both | 368b | GenBank: KHE80901.1 |
| *Pyricularia oryzae* cell division control protein 11 | Both | 383c | GenBank: ELQ63974.1 |
| *Fusarium pseudograminearum* hypothetical protein FPSE_05100 | Both | 408d | NCBI Ref Seq: XP_009256493.1 |
| *Pyrenopeziza brassicae* putative septin | Both | 352 | GenBank: CAB52419.1 |
| *Aspergillus nidulans* septin | Both | 379 | GenBank: AAK21867.1 |
| *Coccidioides immitis* septin-1 | Both | 384 | GenBank: AAK14772.1 |

aWhen the reconstruction was performed, a putative septin protein of 399 residues was used. The current annotation (GenBank AOA64093.1) includes a subunit from *Komagataella phaffii* that is 425 residues. This included an N-terminal extension of 26 residues. The original sequence used was: MSDYIASSAALRKKKTLKKSINFSVMVVGGSGSGRSTFINSLCDQQIVDISANRLPGPQEFDPDSPLGFLFQLRRSNVELEDNEGVRISLNIIDTPGFGRGVENLSQFEVILNYIKHQYDEILIEESKLKRNPRFKDGRVHCCLYLVEATGHGLREIDVELMKQLSTLVNLIPVISKSDSLTETELQLNKRLIREDLTFYGIPVYDFNDEFFQIDKESDYESYQIAQYLNNSVPFAVMGSNKVIDSADPATGHRRVREYPWGLVDVDDNAVSELSVLRNTLLISHLNDFKEYTHEVLYENYRAQALGNDDRYETDGLIDSNRSPISYSRDQSQFDAVTKPLVADSYLAREEQIRLEEERLRVFEERVQSDLLRKRQELEEREKELADIERRLASGAIDV

bWhen the reconstruction was performed, a putative septin protein of 368 residues was used. The current annotation (GenBank KHE80901.1) includes a subunit from *Neurospora* *crassa* that is 395 residues. The original (putative) protein sequenced used is 91% identical to the listed sequence. The original sequence used was: MFTNTISSRQKMMRRKKNVKKGIQFCLMVCGASGTGESFQPPTSLSRQLELDEEGTRIALTIVDTPGFGDQIDNEASFSEIVGYLERQYDDILAEESRIKRNPRFRDNRVHAMLYFITPTGHGLRELDIELMKRLAPRVNVIPVIGRADTLTPAELAESKKLVMEDIEHYRIPVYNFPYDIEEDDEDTVEENAELRGLMPFAIVGSEDIIEIGGRKVRARQYPWGVVEVDNPRHSDFLAIRSALLHSHLADLKEITHDFLYENYRTEKLSKSVEGGAGVDSSMNPEDLASQSVRLKEEQLRREEEKLREIEVKVQREINEKRQELLARESQLREIEARMQREAAAAAQAGTPTTSHSHQEINGSPDGN

cWhen the reconstruction was performed, a putative septin protein of 383 residues was used. The current annotation (GenBank ELQ63974.1) includes a subunit from *Pyricularia oryzae* that is 428 residues. The new annotation includes an additional 45 amino acids at the N-terminus. The original sequence used was:

MSFPAKMMRRKKNVKKGIQFCLMVCGASGTGRTTFVNTLCGKTVLDHKDSDDPSSAHVEEGVKIKDITVELELDEDGTRISLTVVDTPGFGDQVDNEASFSEIVGYLEREYDNILAEESRIKRNPRFRDNRVHAMLYFITPTGHGLRELDIELMKRLAPRVNVIPVIGRADSLTPAELAESKKLVMEDIEHYRIPVYNFPYDIEEDDEDTVEENAELRGLMPFAIVGSEDIIEIGGRKVRARQYPWGVVEVDNPRHSDFLAIRSALLHSHLADLKEITHDFLYENYRTEALSRSVDGGAGVDSSMKPEDLASQSVRLKEEQLRREEEKLREIEIKVQREINEKRQELLARESQLREIEARMQREAASSVGPRDGSEANGEDGN

dWhen the reconstruction was performed, a putative septin protein of 408 residues was used. A more recent annotation (NCBI Ref Seq XP_009256493.1) includes a subunit from *Fusarium pseudograminearum* that is 384 residues. The protein sequences are 93% identical; this removes 29 residues at the N-terminus in the newly annotated sequence. The original sequence used was:

MAKPLEQPKSNTTRILLSWFLASFNIFPLKMIRRKKNVKKGIQFCLMVCGASGTGRTTFVNTLCGKSVLEHKESDDASGAHVEDGVKIKPITVELELDEEGTRISLTIVDTPGFGDQIDNEASFSEIVGYLERQYDDILAEESRIKRNPRFRDNRVHAMLYFITPTGHGLRELDIELMKRLAPRVNVIPVIGRADSLTPAELAESKKLVMEDIEHYRIPVYNFPYDIEEDDEDTVEENAELRGLMPFAIVGSEDVVEIGGRKVRARHYPWGVVEVDNPRHSDFLAIRSALLHSHLADLKEITHDFLYENYRTEKLSKTVDGASGNADSSMNPEDLASQSVRLKEEQLRREEEKLREIELKVQREINEKRQELLARESQLREIEARMQREAAAQNAGTPEPNGGEEQLN

**Table S2**. Posterior probability (MUSCLE) distribution within ancestral septin proteins.

| **Ancestral Protein** | **Posterior Probability** | **Sites** | **Fraction (out of 1)** |
| --- | --- | --- | --- |
| Anc.11-S | 0.90 to 1.00 | 199 | 0.477 |
| 0.80 to 1.00 | 233 | 0.559 |
| 0.70 to 1.00 | 258 | 0.619 |
| 0.60 to 1.00 | 279 | 0.669 |
| Anc.11 | 0.90 to 1.00 | 248 | 0.596 |
| 0.80 to 1.00 | 281 | 0.675 |
| 0.70 to 1.00 | 290 | 0.697 |
| 0.60 to 1.00 | 313 | 0.752 |
| Anc.S | 0.90 to 1.00 | 252 | 0.472 |
| 0.80 to 1.00 | 281 | 0.526 |
| 0.70 to 1.00 | 319 | 0.597 |
| 0.60 to 1.00 | 342 | 0.640 |
| Anc.S1 | 0.90 to 1.00 | 338 | 0.606 |
| 0.80 to 1.00 | 366 | 0.656 |
| 0.70 to 1.00 | 397 | 0.711 |
| 0.60 to 1.00 | 421 | 0.754 |
| Anc.S2 | 0.90 to 1.00 | 375 | 0.692 |
| 0.80 to 1.00 | 403 | 0.744 |
| 0.70 to 1.00 | 434 | 0.801 |
| 0.60 to 1.00 | 457 | 0.843 |

**Table S3.** Fungal and ancient septins examined *in vivo*.

| **Septin Subunit** | **Length (amino acids)** | **Reference** |
| --- | --- | --- |
| *Saccharomyces cerevisiae* Cdc11 | 415 | NCBI Ref Seq: NP_012610.1 |
| *Saccharomyces cerevisiae* Shs1 | 551 | NCBI Ref Seq: NP_010056.1 |
| Ancestral Cdc11-Shs1 (Anc.11-S) | 418 | This study |
| Ancestral Cdc11 (Anc.11) | 416 | This study |
| Ancestral Shs1 (Anc.S) | 534 | This study |
| Ancestral Shs1-1 (Anc.S1) | 558 | This study |
| Ancestral Shs1-2 (Anc.S2) | 542 | This study |
| *Candida glabrata* Shs1 (uncharacterized protein CAGL0G05489g) | 533 | NCBI Ref Seq: XP_446599.1 |
| *Candida albicans* Shs1a (hypothetical protein MEK_00211) | 666 | GenBank: KGT72411.1 |
| *Ashbya gossypii* Shs1 (ABL159Wp) | 580 | NCBI Ref Seq: P_982788.1 |

aThe *C. albicans* protein used in this study includes four substitutions compared to the referenced hypothetical protein MEK_00211 (from *Candida albicans* 12C): S45L, S83L, S578L, and S606L.

**
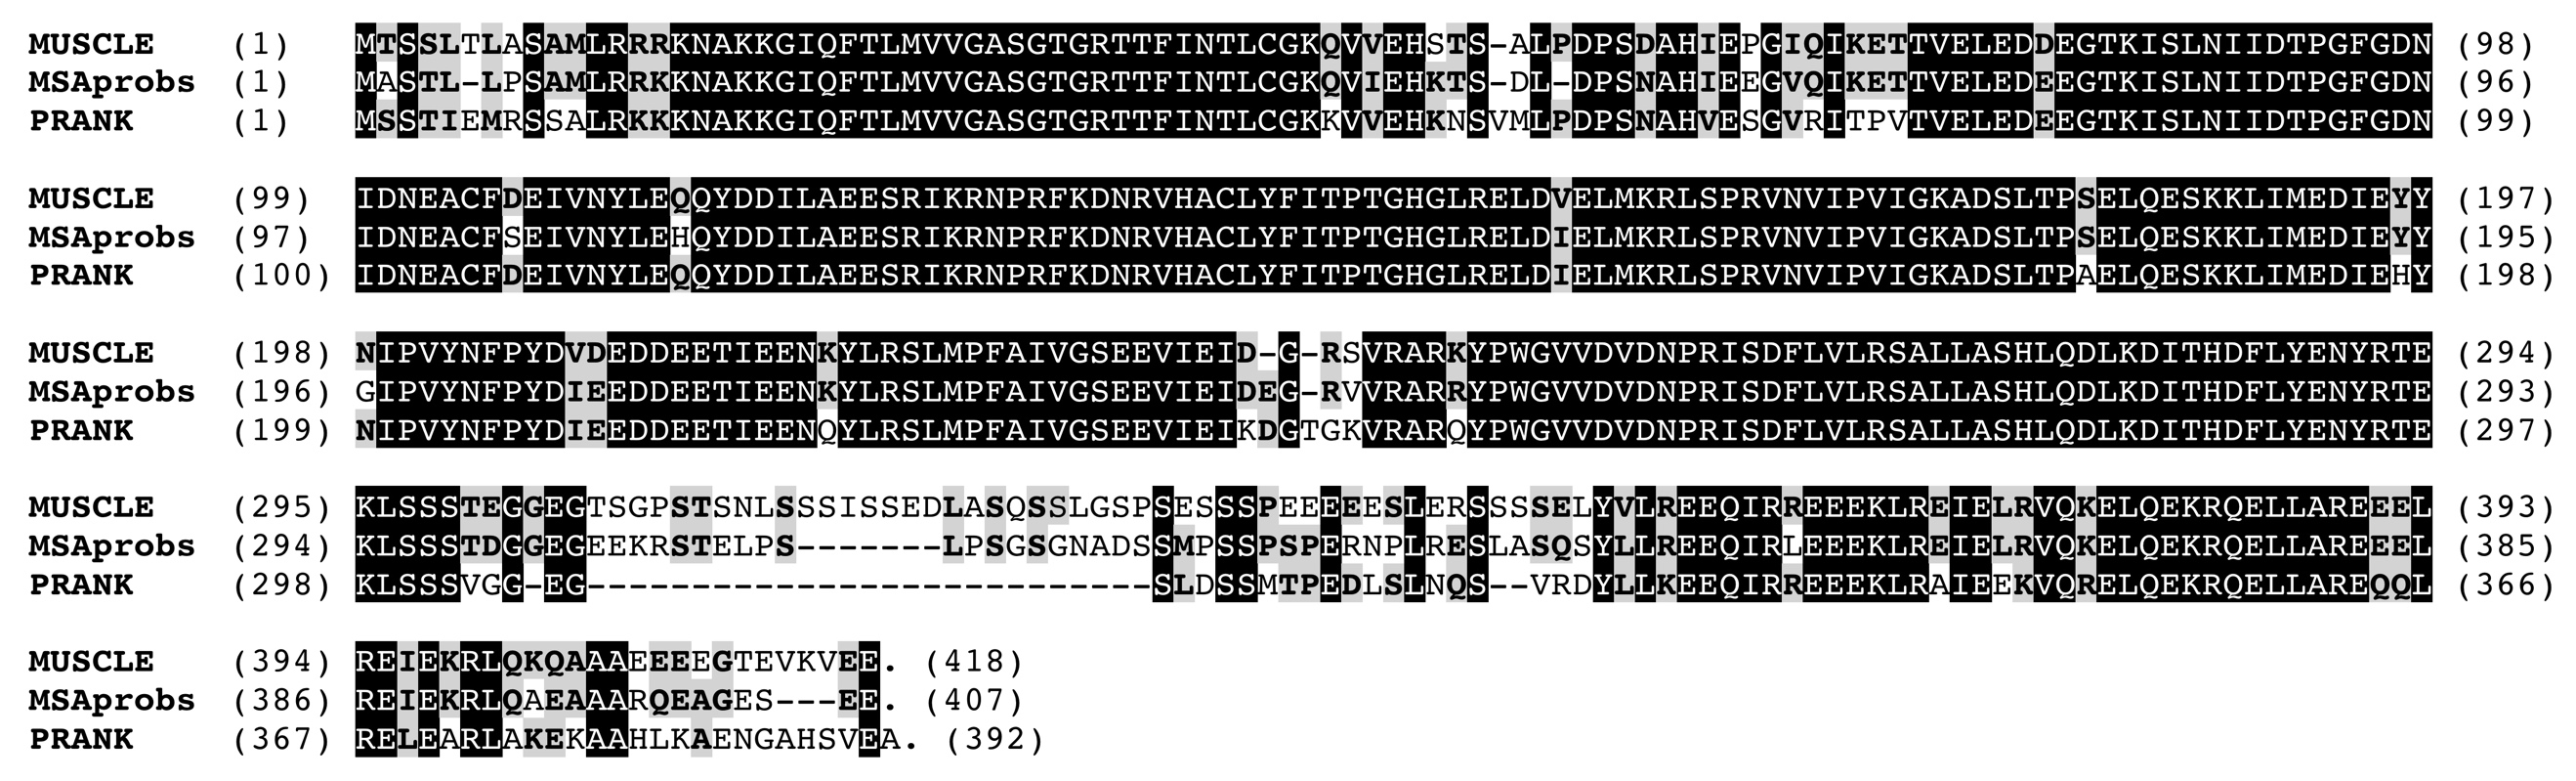
Figure S1**. Anc.11-S sequences from three separate software prediction programs (MUSCLE, MSAprobs, and PRANK). Residues identical between all three programs are represented by white text in a black box. Identities or standard conservative substitutions shared by at least two of the sequences are a bold black letter in a gray box. The Met at position 1 was added for the MUSCLE protein sequence.

**Figure S2**. DNA sequences of ancestral septins, fungal septins, and fluorescent markers used in this study.

**Anc.11-S:**

(yeast codon-biased)

**ATGACCTCCAGTTTAACCTTGGCATCAGCAATGTTGAGAAGAAGAAAGAACGCAAAGAAGGGTATCCAATTCACCTTAATGGTCGTAGGTGCCTCAGGTACAGGTAGAACTACTTTTATTAACACCTTGTGTGGTAAACAAGTTGTCGAACATTCAACTTCCGCCTTACCAGATCCTTCTGACGCTCACATTGAACCAGGTATCCAAATTAAAGAAACCACTGTTGAATTGGAAGATGACGAAGGTACTAAAATTTCTTTGAACATAATCGATACACCTGGTTTTGGTGACAATATTGACAACGAAGCATGTTTCGACGAAATCGTTAACTATTTGGAACAACAATACGATGACATATTGGCAGAAGAATCAAGAATTAAAAGAAACCCAAGATTCAAAGATAACAGAGTTCATGCCTGCTTGTATTTCATAACACCTACCGGTCACGGTTTGAGAGAATTAGATGTAGAATTGATGAAGAGATTGTCACCAAGAGTCAACGTAATACCTGTTATAGGTAAAGCAGATAGTTTGACCCCATCTGAATTACAAGAATCCAAAAAGTTAATCATGGAAGACATTGAATACTACAACATCCCAGTCTACAACTTTCCTTACGATGTAGACGAAGATGACGAAGAAACAATCGAAGAAAATAAGTATTTGAGAAGTTTAATGCCTTTCGCAATCGTAGGTTCTGAAGAAGTTATAGAAATCGATGGTAGAAGTGTTAGAGCCAGAAAGTACCCTTGGGGTGTAGTTGATGTTGACAACCCTAGAATCTCTGATTTCTTGGTCTTAAGATCAGCTTTGTTAGCATCCCATTTGCAAGATTTGAAAGACATTACTCACGATTTCTTGTACGAAAACTACAGAACCGAAAAGTTATCTTCATCCACTGAAGGTGGTGAAGGTACTTCAGGTCCAAGTACATCTAACTTGAGTTCTTCAATTTCCAGTGAAGATTTGGCTTCCCAATCTTCATTAGGTTCACCATCCGAATCCAGTTCTCCTGAAGAAGAAGAAGAATCTTTAGAAAGATCATCCAGTTCTGAATTGTACGTCTTAAGAGAAGAACAAATCAGAAGAGAAGAAGAAAAATTGAGAGAAATCGAATTAAGAGTTCAAAAGGAATTGCAAGAAAAGAGACAAGAATTGTTAGCAAGAGAAGAAGAATTGAGAGAAATCGAAAAGAGATTACAAAAGCAAGCTGCTGCTGAAGAAGAAGAAGGTACAGAAGTTAAGGTCGAAGAA**

**Anc.11:**

(yeast codon-biased)

**ATGTCATCTATTATCGAAGCATCCGCCGCATTAAGAAAAAGAAAGAACTTGAAAAAGGGTATCCAATTCACTGTTATGGTTGTCGGTCAATCCGGTTCTGGTAGATCAACTTTTATTAACACTTTGTGTGGTCAACAAGTTGTCGATACTTCCACTACAGTCATGCCAGATCCTACAGACACCAGTTTGCAAATCGATGTACAATTGAGAGAAGAAACAGTTGAATTGGAAGATGACGAAGGTGTTAAAATTTCTTTAAACATAATCGATACCCCAGGTTTTGGTGACTCATTGGACAACTCTCCTTCATTCGATGTCATAGTAGACTACATCAGACATCAATACGATGAAATTTTGTTAGAAGAATCAAGAGTTAAGAGAAACCCAAGATTCAAAGATGGTAGAGTCCATTGTTGCTTGTATTTGATTAATCCTACTGGTCACGGTTTAAGAGAAATCGATGTAGAGTTTATGAGACAATTGTCACCATTAGTTAACGTCATCCCTGTTATTAGTAAGGCTGATTCTTTGACACCAGAAGAATTGCAATTGAACAAAAAGTTAATAATGGAAGATATAGACTATTACAACATACCAATATACAACTTCCCTTTCGATGAAGACGAAGAAGATGACGAAACTTATGAAACTAACACATACTTGAGATCATTGTTGCCTTTTGCCATCATTGGTTCAAACGAAGTCTTCGAAACCGCCGATGGTGCTGTAATTAGAGCTAGAAAATATCCTTGGGGTACTATCGATGTTGATGACCCTTCCATTAGTGACTTCGTAGTTTTGAGAAACGCATTGTTAATTTCACATTTGAACGATTTGAAGGACTACACTCACGAAATATTGTACGAAAACTACAGAACAGAAGCATTATCAGGTGAAATGTCCACAGCCGGTAGTACCTCTTCACCATCTACCACTAATTCCAGTTCTTCAGCTGCATCCAGTGAATCTGGTTCACAATCCGCCAGTGGTTCTGGTAGACCATCTTCAACCCCTCAAGATTCAAGAAATTCCTTGGAAAACTCCAGTTCTTCAGAATCCTATTTGGCTAGAGAAGAACAAATCAGATTGGAAGAAGAAAGATTGAGAGCATTCGAAGAAAGAGTTCAACAAGAATTGTTGTCTAAGAGACAAGAATTGTTACAAAGAGAACAAGAATTGAGAGAAATCGAAAAGAGATTGGAAAAGGAAGCAAAAACAAAGCAAGAGGGTGACTTGATAATCGAAGAC**

**Anc.S:**

(yeast codon-biased)

**ATGGAAACCTTGTTGTTATTCACCACCTCATCATTGTCATCAAACTCCGCTATGTTAAGAAGAAAGAAAGACGCTAAAAAGGGTATTAAGTTTACTTTTATGGTTGTCGGTGCTTCTGGTACTGGTAAAACTACTTTTATTAACTCTTTGTTGAACAAACAAGTAGTTCCACATAGATACGAAGAAGAATTACCAGAATCTTTAGATCCAAAGACTTTGTCTTTTACCTCAACTAAATCCGTTGCTTTAGACTCCACAAGTGCATTGCCATCAAATGAATTTGATCCTTCTTCAGCCCACTTAGAACCAGGTATAGCTATCACAGAAACCAGTGTAGAAATCGTTGATGACGATTCTACAAAGATCATGTTGAACATAATCGATACCCCTGGTTTTGGTGACAATTTGGATAACGAAATTTGTTTCGAAGAAATCACTAACTACTTAGAACAACAATTCGACTCTGTTTTGGCCGAAGAAACCAGAATTAAAAGAAACCCAAGATTCGAAGATACTAGAGTTCATGCTTGCTTATATTTCATTACTCCTACAGGTCACGGTTTAAGAGAATTGGATGTCGAAATGATGAAAAGATTGTCTAAGTACGTCAATGTAATCCCAGTTATTGGTAGAGCAGACTCTTTTACTCCTTCCGAATTACAACAATTCAAAAAGCAAATCATGGAAGATATTGAAAGATACAACGTTCCAGTCTACCAATTCGAATACGACGAAGATGAAGACGATGAAGAAACAATAGAAGAAAACAAGTTCTTAGCATCATTGCAACCTTTCGCCATCATTGCTTCCGAAGAAGAAATAGAAATCGATGGTCCAACTATCAGAGCCAGACAATACCCTTGGGGTACAGTAGACATCGATAATCCAGCAGTTTCTGACTTTGCCGTTTTGAAGAGTGTCTTGTTAGGTTCTCATTTGCAAGATTTGAAAGATTTGACACACGATTTCTTATACGAAAACTACAGAACTGAAAAATTGTCCAGTGTTACAGGTGGTTCAGAAGGTTTATCTGATTCAAGAGGTGAAAACGAAGAAGAAGAAGAAAAGTTGTCTACAGCACCATCCTTGAGTAACTTAGCCTCTTTGACCTCTTCAGGCAATTTGAAATCAAACTCCAGTTTGGGTCAACCACCTGAATCTTTATCAGATTCTTCACCAGAAAGTACCGGTACTCCTGAATCTAAGGAAGAATCCAGTTTAAGAAAATCAACCTCTTCATCCTTGAGAGAAGGTAGTTCTGCTTCATCCAGATTACCACCTGGTCCACAAAGATCACAATTGAGAAATATCTCCGAAACAGTCCCTTATGTATTGAGACATGAAAGAATATTGGCAAGACAACAAAAATTAGAAGAATTGGAAATGAGATCAGCTAAGGAATTACAAAAGAGAGCACAAGAATTGGAAAAGAAAGCTGCTGAATTGAAATTGAGAGAAAAGTTGTTGTTGAAACAATCCGAAAGTGAAAAGCAATTATCATTGGAAGAAGAATCCAACGAAAGTTCTTCAGAAGCTGAAGGTACTCATATTAAAAAGGAAGAAACATTGACCGATTTGCACAGTATAGTTTCTAACAAAGAA**

**Anc.S1:**

(yeast codon-biased)

**ATGTCCGCATCACCAATCAGTATGACTTATTCCCCTGCCTTGCCACCAGCTATGTTTAGAAGAAAGAAAGAACACAAAAGAGGTATCACATTTTCCATGATGTTAGTTGGTGCCAGTGGTACTGGTAAAACTACATTCGCTAACAACTTGTTAGAATCTACAATTTTCCCACATAGATACCAAGAAGAAGAACCAGCTTCTTCATCCAATCCTAGAGTCAAAATTATATCTCCAACTAAGGTTGTCAGTTTTAACTCTAAGAATGGTATCCCTTCATACATGGCCGAATTTGATCCAAGTTCTGCTCATTTGGAACCTGGTATCACAATTACCTCAACTTCCGTCGAAATTACATCATCCAGTGAAGAAGATAACGACAGTGATTCTCAAGACAAAATTTCTTTTAATTTGATAGATACACACGGTTTGGGTGAAAACTTAGACAACTCTTTGTGTTTCGATGAAATCACCTCATATTTGGAACAACAATTCGACTCCGTTTTGGCAGAAGAAACTAGAATTAAAAGAAACCCAAGATTTGAAGATACAAGAGTACATGTTGCCTTGTATTTCATAGAACCTACAGGTCACGGTTTGAGAGAATTAGATGTCGAAATGATGAAGAGATTATCAAGATACACTAACGTATTGCCAATCATTGCAAGAGCCGACTCTTTTACTCCTGAAGAATTAACAAGATTCAAAAAGCAAATAATGGAAGATATAGAAAGATTCAATGTCCCAGTATACAAATTCGAAGTAGACCCTGATGAAGATGACTTGGAAACTATTGAAGAAAACCAAGCATTGGCTGCATTACAACCATTTGCAATAATCTGCTCAGATGAAAAAGACAATGCCGATGGTAAATATGTTAGAGAATACCCTTGGGGTGAAATAGACATCGATAACGACAACATAAGTGATTTGAGAGTATTGAAAAATGTTTTGTTCGGTTCTCATTTGCAAGAGTTTAAAGATACCACTCAAAACTTGTTGTACGAAAACTACAGAGCAGAAAAATTATCTTCAGTTTCTGAATGGGATTTGGAAAAGTCTAATGGTGAAGACACATCAATCGATGAAGAAAATAAGAACGGTAATTCCAGTGGTTTGTTAAAGAGTACCGCACCATCATTATCCAACTTTGCCTCTTTGATTAATACTGGTCAATTCAAATCACAACAATCCTTAGCTATGCCACCTCAATCTGAAACCCCATCAACTCCTGAATCCACTGGTGTTAGTGAAGGTGAAGAAGATGAATCATTGTTGAGAGAATCTTCACAACCAATAAGACAAGCATCCGAAGAAATCAGACAAGATTCCAGTCCTAGAACAAACACCCCAGGTTCACCTGAAAGAACCAAATTGAGAAACATATCCGAAACTGTTCCATACGTTTTGAGACACGAAAGAATTATAGCTAGACAACAAAAGTTGGAAGAATTAGAAGCTCAATCTGCAAAGGAATTGCAAAAGAGAATACAAGAATTGGAAAAGAAAGCCGCTGAATTGAAATTGAGAGAAAAGTTGTTGAGACAACAATCTCAAAACGGTAGTCAAGAATCTTTAGAATCAAGATCATCTTCTCAAAGTTCTACATCTCCAGGTACTCAAATTAAAAAGGAAGAAACTTACACAGATTTGGCATCCATAGTTAGTGGTAAAGAA**

**Anc.S2:**

(yeast codon-biased)

**ATGCAATCCAGTCCAGCCTTACCACCAAGTTTATTCAGAAGAAAGAAAGAACACAAGAGAGGTATTACTTACTCAATGATGTTATGCGGTCCAGCTGGTACAGGTAAAACTACATTCGCAAACAACTTGTTAGAATCTAACATTTTCCCTCATAAATATAACTCCGGTGACAGTGCTACATCTTCAAAATTGATCCCAAGAGTAAAGGTTATCTCCCCTACCAAAGTTGTCTCTTTTAATTCTAAAAATGGTATTCCTTCATACATGGCAGAATTTGATCCATCCAGTGCCAATTTGGAACCTGGTATCACCATCACTTCTACATCATTAGAAATATCAGGTTCTTCAGATGAAAATGAACATGAAAACGACGAAGATACCATCTTGTTTAATTTGATTAATACTCACGGTATCGGTGAAAATTTGGATGACTCCTTATGTTTTGACGAAGTCACAAGTTATTTGGAACAACAATTCGATATTGTATTGGCTGAAGAAACAAGAATTAAAAGAAACCCAAGATTTGAAGACACCAGAGTTCATATCGCATTGTATTTCATTGAACCTACTGGTCACGGTTTGAGAGAATTAGATGTTGAATTGATGAAGAGATTGTCAAGATACACCAATGTCTTGCCAATAATCGCAAAGGCCGATTCTTTTACTAAGGAAGAATTAAAGCAATTCAAAAAGAATATAATGGATGACATAGAAAGATATAACGTCCCAGTATACAAATTTGAAGTTGATCCTGATGACGATGACTTAGAAACAATAGAAGAAAACCAAGCCTTGGCTGCATTACAACCATTCGCTATCATTTGCTCAGACACTAAAAACGCTGATGGTAAATATGTTAGAGAATACCCTTGGGGTACAATATCTATCGATGACGATAACATCTCAGACTTGAGAGTATTAAAGAACGTTTTGTTCGGTTCTCATTTGCAAGAGTTTAAAGATACCACTCAAAATTTGTTGTACGAAAACTACAGAGCAGAAAAGTTGTCCAGTGTTACTGAAAATGATCCAACCGCCACTAACGGTGAAGAAACACAAGAAGAAGAAAAGCAACAAAATTCTGCCGCTCCTTCCTTGAGTAACTTCGCATCATTAATTAACACTGGTCAATTCAAGTCCCAACAAAGTTTGGCCATGTCTCCAGAAGCTCCTACAACCCCAAAGCCTAATGAAGGTGAAAAACACGAATCCTTAGACAACGATTCTGAATCACCAATTAAACAAATGAGTGATGAAATCAGACAAGAAAACGAAGAAATCATCAGAAACATCAAGTCCCCTAAGTTAACCAATAGTCCAGGTACTCCTGAAAGAACAAAATTGAGAAACATCTCTGAAACTGTTCCATACGTTTTGAGACATGAAAGAATCATCGCCAAGCAACAAAAGTTGGAAGAATTAGAAGCTCAATCTGCAAAGGAATTGCAAAAGAGAATACAAGAATTGGAAAAGAAAGCACACGAATTGAAATTGAGAGAAAAGTTGTTGAGACAACAATCTCAAAATGGTTCTTCATCCAGTACTACATCTTCATCCAGTCCAAGAACTCAATTGAAAAAGGAAGACACATACACTGATTTGGCTTCTATTGTTTCAGGTAGAGAA**

***C.glabrata* *SHS1*:**

(yeast codon-biased)

**ATGGACTCCCCAAGTATTCCTAACTCATTGTTCAGAAGAAAAGATAAGCATAAAAGAGGTATTGTATATTCCGTCATGTTGTGTGGTGCCTCTGGTACTGGTAAAACTACATTCGCTAACAACTTGTTAGAATCAAATTTGTTTAAACATAAGTATAACGGTGGTTTGCACGAGTTTAATCCAAACACAAACGATTACTTAACTGTTACAAAGCCTACCAAGATCATATCATTCAATTCCAACAACGGTTTGCCATCTCAATCAATGGAAAATTTGATGGACTTAACAAACTCTTCAGAATTTGATCAAGTATTCAATCCTGCAACCCAAAACAAAGATTCAGGTATAGCCATCACCTCCACTAGTTTTGAAATCAGATCCAAGAATGAAGAAAAGAATAAGTACGATGTTGACATGGATACCATATATTTGAATTTGATCATGACTTTGGGTTTGGGTGAAAACATCGATAACTCAATCTGTACTTCCGAAATTGACTTGTTTTTAAGACAACAATTCGATACAGTCTTGGCAGAAGAAACCAAGATCAGAAGAAACCCAAGATTCGAAGATACTAGAGTACATATCGCCTTGTACTTCATCGAAAACACAGGTCACGGTTTGAGAGAACAAGACGTCGAATTGATGAAGACATTGACCAAGTACACAAACGTATTGCCAATCATATCAAAGGCCGACTCTTTTTCACCTGAAGAATTGAAGACTTTCAAGACAGCTGTTATGAACGATATTGAAAGATACAACATTCCAATATACAAGTTCGATATTGATTTGACCGACCCTTCTCAAGAATTTGACTTGGATCAACAAACTATCGAAGAAAACGAATATTTGGCTGCATTACAACCATTTGCTACAATCTGCTCTGATCAAAGAAATGCTGAGGGTAAAGCAGTTAGAGAATACCCTTGGGGTAGTATCTTGATAGATGACGAAAACATCTCTGATTTGAAAATCTTAAAGAACGTCTTGTTTGGTTCTCATTTGCAAGACTTCAAGGATACCACTCAAAACGTATTGTACGAAAACTACAGAGCTGAAAAATTGTCCAGTGTTACTAACAACAAGTACGAAGCAACAAATCCACAATCAAACGATCAAAACATAAAGAGACAATCCACTGTCCCTTCCTTGAGTAACTTCCAAAGTTTAATACAAACAGGTCAAATTAAATCTTACCAAAACTTACCAATTTCTCCATCACCTTCCCAAAACGGTAATACCAACCAAGCAACTGAAAATTTGGAAGATACAACCAACATGAGTGTTATCTCTGAACATTCAGGCATGTCCCAAGGTGGTGTCCCAGAAAGATCACAATTGAGAAACATCTCCGAAACTGTTCCTTATGTCTTGAGACACGAAAGATTGTTGGCTAAGCAACAAAAGTTGGAAGAATTAGAAGCCCAATCTGCTAAGGAATTGCAAAAGAGAATACAAGAATTAGAAAGAAAGGCACATGAATTGAAGATGAAGGAAAGAAGATTGTTGAGTGTATCTGATGTTCCAAATAGTCCTCAAGTTTCTATTAAGAGAGGTGACACATACAATGATTTGGCAAGTATGGCCTCTAACAGA**

***C.albicans* *SHS1*:**

**ATGTCACGTTTTGATTATAGAAATACTTCAAAAAATACTAGTGTTGTTGATCCTGATCATAGTTCACCAATAATCAATTATCGGAAGGATGCCAAAAAGGGGATCAAATTTACATTTATGGTGGTTGGAGAACTGGGTACTGGTAAAACTACATTTATTAATAGTTTATTAAATAAAAAAGTTTTGAATCATCGTTATGAAAAATTGAGTCCAACAGTTGGTGATACCAAAACATTAATGTTTACCCTGGCCAAATCAGTGGCATTACCAAACACGTCTATATTGACAAAGAATGAATTTAATCCAAGAACTATAAATGAAGAACCAGGTATTGCCTTGACGGAAACTCATATTGAAATTATTGATGATGATAATCAAAAATTATTGTTGAATATTATAGATACACCAGGATTTGGAGAAAATTTAAATAATGAATTGTGTTTTATTGAAATTGAAAATTATTTAAAGCAACAATTTGATTTAGTATTAGCTGAAGAAACGAGAATTAAAAGAAATCCTCGTTTTGTTGATACTAGAGTACACGTTATGTTATATTTTATTACTCCTACTGGACATGGATTAAGAGAAATTGATATACAATGTATGAAAAGATTGAGTAAATATGTCAATATTATCCCGGTTATTGGTAAAGCTGATTCTTTTACTTTAAATGAATTGCAACATTTTAAACAACAAATTAGAATTGATATTCAAAAATTTAATGTTCCAACGTTTCAATTTGATAATTCTTTAAATGATTATGATGAAGATGAAGATTATGATTTGATTCAAGAATGTAAATTTTTAACTAATTTACAACCATTTGCTGTTGTCACGTCAGAAGATGTTTTTGAAGTTAGAGAATCAACTACTAATACTAAAGGTAATAATGATAAACCAAAAATTATAAGAGCCAGAAAATATCCTTGGGGGTTAGTTGATATTAATGATACTAGATATAGTGATTTCCCCATTTTGAAATCTGTATTGTTGGGGTCTCATTTACAAGATTTGAAAGATTTAACTCATGATTTCTTGTATGAAACTTATAGAACTGAAAGATTGACTAAAGTTACTGGGAATGGACAAGCATTTGATGATGAAGAAAATGAAGATGCTGAATTTCATGATACAGTTGAACATCAACTCAATGATTCCAATAGAGGTGTTGGCGGTGATGATAATAATAATAATACTTCTACAATCCCATCAATGTCCAATTTGGCTCAATTGACAACTAGTACCAATGAACATGATGCAAGTCATATTGATAATAATTCAATAACATCGACTAGTTCATCAATAAAGAAGTCTACTTCAATGTTGATAGATGATCATCCTTCATCATCACCAAAATTGAAAAATATAAGTTCTTTTACATCATCAACTTCTACTGTCTCACTTGAAGGTGGCGAAAAAGAAGGTGGTCATCATGACAGAGGGGCTAATAGTACCAGTACCAACAACAATAATAATAATAATAATAATGCCTTTAAAAGATTATCAATTGGACCTCAACGTAATCAATTGCGTCAAATTTCAGAGACTGTACCTTATGTGTTGAGACATGAAAGAATTTTGGAAAGACAACAAAAGTTGGAAGAAATGGAACAAGCAAGTGCTCGAGAATTGGCTAATAGAGCAGCACTTTTAGAAAAGAAGGCAGCTCAATTGAAAGCTAAAGAAAAAGCTTTGAGACAATTAGAATTAAATAGACAAAAGCAAGAAGAACTGGCTACTTCAAGTTTACATAGAAAAGATAGTGATATTAGTGGCAGTGTTCAAAGTGGTGGTGTTGATGATGGTAAATCTGAACTGACCAATAATAATAATAATAATAGAAATGGATATGGATATGGACATGGTCATGGACATGGACAAAGTCATGAGTATGATAATTCAGAATATCATCATGATGATAGTACACCAAATTATGAAACTTCAAGATTGCAAAAGGATGAAACTTTGACTGATTTACATTCGATTGTAAGCAATCAT**

***A.gossypii* *SHS1*:**

**ATGACCGCCGTCCAATATTCGAACGCACTACCTCCAGCCCTTTTCCGGCGGAAGAAGGAGCAGAAGCGCGGTGTAACATATAGCGTGCTGCTGGTCGGCCCCAGTGGAACTGGAAAGACCACGTTTGCCAATAATCTGTTAGAGTCCACGATCTTCAGCCATCGGTACCAGACAGAACAACCCCAGTACCAGAATCCAATGGTAAAAGTGGTGAACCCTACGAGAGTGGTGACGTTTAACTCGAAGAATGGGATTCCGTCGTACCAGGTTCCGTTTGATCCGATGGGGGCTCACTTGGAGCCCGGGATCACGATTACAGCGACGTCCGTAGAGGTGAGCACGGACAGTTCATCAGATGACCCTCGGGACAAGATGTGCTTTAATTTAATTGATACCCATGGTATTGGAGAAAACCTGGACAACGAATTGTGCTTTGATGAGGTGGTAGCATACTTGGAACAGCAGTTTGATTTGGTACTCGCAGAGGAGACACGTATCAAAAGAAACCCTCGCTTCGAGGATGGTCGTATCCATGCTGCCTTGTACTTCGTTGAACCTACCGGCCATGGTCTACGGGAGCTTGATATCGAGATGATGAAAAGATTATCACGGTACACCAACGTGCTTCCCATCATTGCTCGCGCAGATTCTTTTATGGAAGATGAACTTTCCAGCTTCAAGGCAGCAGTGATGCGGGATATCGAGAACTATAACGTTCCCGTATATAAGTTTGAGGTAGATGAGGATGAGGACGACCCCGAAACTTTACAGGAGGTGGGCGATCTGGCGGCCATACAACCGTTTGCTGTTGTATGCTCGGACACGAAAGGTAAGGATGGGAGATACGTAAGAGCCTATCCATGGGGCGATTTGTTCATTGATGACGAGACCGTTTCTGATCTGCGAGTATTGAAGAGTGTGTTATTTGGTTCTTACCTACAAGAATTCAAGGACACTACCCACAATCTATTGTATGAAAACTACCGTGCCGAAAAGTTATCATCCATCTCTGAATGGGATACGACCAAGACATCTTCAAAGGGTACTTCAATAGTAAAGACCGAGAAGAATTCCTCTACTCCTTCTTTGAGCAACTTTGCGTCCATTGTGAACACTGGAAACCTAAAATCCCAGCAATCTTTGACAAAGGTACCAAACTCGGATGTACCTGCCCCTTCAACCCCAAGCAATGAAAGTGACAGTCTCTTCAGAGAGACAGAATCACCAATCAGGAAGATGTCAGTTAATATAAGGCGCGATAATGAAGAAATAATCAGAAACATAAAAAGCTCACCATCCACTGCCGAAAGCGGCTCTCAGGATAGGACGAAGCTGAGAAACATATCGGAGACACTGCCATATGTGTTGAGACATGAGCGTATTATTGCCAAACAACAAAAGCTGGAGGAATTGGAGGCACAATCAGCTAGGGAACTTCAAAAAAGAATTCAAGAATTGGAAAAAAAGGCTATGGAACTAAAACTAAAAGAGAAGTTACTAAAACAACAGAAACGGAATGGCTCTACGACGTCAATAGGATCAACTGTGACCGCAACGTCTGCTGCTTCCACCAACCTCACCAGTGGGAAGCCAACCATTATGCAAGAAGGAACACCATCTACAGTGAATCGTGCGCGTAACGGATCCCTTGTCTCGCCATCCACTCAGGTATCTCCATCTGCCGACTCTAGTCAATTTGCTAGTGATGGATATGCTTCCCGCGCAACAGGCCAGGTACAA**

***S.cerevisiae* *SHS1*:**

**ATGAGCACTGCTTCAACACCGCCAATTAACTTATTTCGTAGAAAGAAAGAACATAAACGTGGGATCACATACACAATGTTACTATGTGGGCCAGCAGGTACAGGAAAGACCGCCTTTGCTAACAATCTATTGGAAACTAAGATCTTTCCGCATAAGTATCAATACGGTAAATCAAATGCTAGTATTAGCTCTAACCCAGAAGTAAAAGTTATTGCTCCGACAAAAGTTGTTTCATTTAATTCGAAAAATGGGATTCCATCTTATGTTTCTGAATTCGATCCAATGAGAGCCAATTTGGAACCAGGTATTACCATCACCTCCACTTCATTAGAACTTGGGGGCAACAAAGATCAAGGAAAGCCAGAAATGAACGAGGATGATACCGTGTTTTTCAACTTGATTATGACGCATGGTATAGGCGAAAACTTGGACGATTCGTTGTGTTCTGAGGAAGTTATGTCGTATTTAGAACAACAATTTGACATTGTTTTAGCTGAGGAAACCAGAATTAAAAGGAATCCGAGGTTTGAGGACACCAGGGTTCACGTAGCATTATATTTTATTGAACCCACTGGACACGGTCTGAGAGAAGTCGATGTAGAGCTCATGAAAAGCATCTCCAAATACACAAATGTACTGCCAATAATAACAAGAGCTGACTCATTCACCAAGGAGGAGCTAACTCAATTCAGGAAAAATATTATGTTTGATGTGGAAAGATACAACGTCCCAATTTACAAATTTGAGGTTGACCCTGAAGATGATGATTTGGAATCCATGGAAGAGAATCAAGCCTTGGCATCCTTGCAACCATTTGCTATTATAACTTCAGATACCAGAGATAGTGAAGGTAGATACGTTAGGGAGTATCCGTGGGGGATAATATCAATCGACGACGACAAAATTTCGGATTTGAAAGTTTTAAAAAACGTCCTGTTTGGCTCTCACTTACAAGAATTCAAAGACACCACGCAAAATTTGCTTTACGAGAATTACCGTTCCGAAAAACTATCGTCCGTGGCCAACGCTGAAGAAATTGGTCCTAATTCTACAAAGAGACAGTCAAATGCTCCAAGTTTAAGCAACTTTGCCTCTTTGATAAGCACTGGTCAATTCAATTCTTCTCAAACTCTTGCAAACAATTTGAGAGCGGACACACCAAGAAACCAAGTAAGTGGAAACTTTAAGGAAAACGAATACGAAGACAATGGCGAACATGATTCAGCAGAAAATGAACAGGAAATGTCTCCCGTGAGACAGTTGGGTAGAGAAATAAAACAAGAAAATGAAAATTTGATAAGATCTATCAAAACAGAATCTTCACCAAAATTCTTGAACTCTCCGGACTTACCAGAGCGTACCAAGTTAAGAAATATTTCAGAAACCGTTCCATATGTCTTGAGACATGAAAGAATTTTAGCAAGACAACAAAAACTGGAAGAGTTAGAGGCCCAGTCAGCTAAAGAATTACAAAAAAGAATTCAAGAATTAGAAAGAAAAGCACACGAATTGAAATTGAGGGAAAAACTAATAAATCAGAATAAACTAAACGGTTCATCATCTTCAATCAATTCTCTACAACAGAGCACAAGGAGCCAAATTAAAAAAAATGACACGTATACTGATTTAGCCTCTATTGCATCGGGTAGAGAT**

***S.cerevisiae* *CDC11*:**

**ATGTCCGGAATAATTGACGCATCTTCTGCATTAAGAAAAAGAAAGCATTTGAAAAGAGGTATAACCTTCACTGTGATGATCGTGGGCCAGTCCGGATCTGGTAGATCGACTTTTATAAATACTTTGTGCGGTCAGCAAGTTGTAGACACTTCGACGACAATCTTGTTACCCACAGATACGTCCACAGAAATAGACTTACAATTGAGAGAGGAGACGGTCGAATTAGAAGATGATGAAGGTGTCAAGATTCAACTTAATATCATCGATACTCCGGGATTCGGTGATTCTCTCGACAATTCTCCATCTTTCGAAATCATTTCCGACTACATTCGCCACCAATATGATGAAATCTTATTGGAAGAAAGTCGTGTGAGAAGAAACCCAAGATTTAAGGACGGCAGAGTTCATTGTTGTCTTTACTTAATCAACCCAACTGGCCACGGTTTAAAAGAGATTGATGTGGAATTCATCAGACAGTTGGGATCCTTAGTTAACATCATCCCTGTGATCAGCAAATCAGATTCCTTGACAAGAGATGAACTGAAACTGAATAAAAAATTGATCATGGAGGATATCGACAGATGGAACTTGCCAATTTATAATTTCCCTTTCGATGAAGATGAAATATCAGACGAAGATTACGAAACCAATATGTACCTACGTACACTTCTACCTTTTGCTATTATTGGATCCAATGAAGTTTACGAAATGGGCGGCGATGTTGGGACAATTCGTGGCAGAAAGTATCCATGGGGCATACTGGACGTGGAAGATTCATCGATCTCTGATTTTGTTATCTTAAGGAATGCGTTATTGATCTCTCATTTACATGACTTGAAAAACTACACACATGAGATATTATATGAAAGATATAGAACCGAGGCATTATCAGGTGAATCTGTCGCGGCAGAATCCATACGTCCAAATCTGACAAAATTGAATGGTTCGTCGTCATCGTCCACCACAACAAGGAGAAACACAAATCCCTTCAAGCAAAGTAATAATATTAATAACGATGTTCTCAACCCAGCATCCGATATGCACGGGCAAAGCACTGGCGAAAATAACGAAACCTACATGACACGTGAGGAGCAAATACGGTTAGAAGAAGAGCGACTAAAGGCATTTGAGGAGAGAGTTCAGCAAGAACTGCTGTTGAAAAGACAAGAACTGTTGCAAAGAGAAAAGGAATTAAGAGAAATTGAAGCCAGGTTGGAAAAAGAGGCGAAAATCAAACAGGAAGAA**

**mCherry:**

GTGAGCAAGGGCGAGGAGGATAACATGGCCATCATCAAGGAGTTCATGCGCTTCAAGGTGCACATGGAGGGCTCCGTGAACGGCCACGAGTTCGAGATCGAGGGCGAGGGCGAGGGCCGCCCCTACGAGGGCACCCAGACCGCCAAGCTGAAGGTGACCAAGGGTGGCCCCCTGCCCTTCGCCTGGGACATCCTGTCCCCTCAGTTCATGTACGGCTCCAAGGCCTACGTGAAGCACCCCGCCGACATCCCCGACTACTTGAAGCTGTCCTTCCCCGAGGGCTTCAAGTGGGAGCGCGTGATGAACTTCGAGGACGGCGGCGTGGTGACCGTGACCCAGGACTCCTCCCTGCAGGACGGCGAGTTCATCTACAAGGTGAAGCTGCGCGGCACCAACTTCCCCTCCGACGGCCCCGTAATGCAGAAGAAGACCATGGGCTGGGAGGCCTCCTCCGAGCGGATGTACCCCGAGGACGGCGCCCTGAAGGGCGAGATCAAGCAGAGGCTGAAGCTGAAGGACGGCGGCCACTACGACGCTGAGGTCAAGACCACCTACAAGGCCAAGAAGCCCGTGCAGCTGCCCGGCGCCTACAACGTCAACATCAAGTTGGACATCACCTCCCACAACGAGGACTACACCATCGTGGAACAGTACGAACGCGCCGAGGGCCGCCACTCCACCGGCGGCATGGACGAGCTGTACAAG**TAA**

**GFP:**

**GGTCGACGGATCCCCGGGTTAATTAACAGTAAAGGAGAAGAACTTTTCACTGGAGTTGTCCCAATTCTTGTTGAATTAGATGGTGATGTTAATGGGCACAAATTTTCTGTCAGTGGGGAGGGTGAAGGTGATGCAACATACGGAAAACTTACCCTTAAATTTATTTGCACTACTGGAAAACTACCTGTTCCATGGCCAACACTTGTCACTACTTTGACTTATGGTGTTCAATGCTTTTCAAGATACCCAGATCATATGAAACGGCATGACTTTTTCAAGAGTGCCATGCCCGAAGGTTATGTACAGGAAAGAACTATATTTTTCAAAGATGACGGGAACTACAAGACACGTGCTGAAGTCAAGTTTGAAGGTGATACCCTTGTTAATAGAATCGAGTTAAAAGGTATTGATTTTAAAGAAGATGGAAACATTCTTGGACACAAATTGGAATACAACTATAACTCACACAATGTATACATCATGGCAGACAAACAAAAGAATGGAATCAAAGTTAACTTCAAAATTAGACACAACATTGAAGATGGAAGCGTTCAACTAGCAGACCATTATCAACAAAATACTCCAATTGGCGATGGCCCTGTCCTTTTACCAGACAACCATTACCTGTCCACACAATCTGCCCTTTCGAAAGATCCCAACGAAAAGAGAGACCACATGGTCCTTCTTGAGTTTGTAACAGCTGCTGGGATTACACATGGCATGGATGAACTATACAAATAG**

**
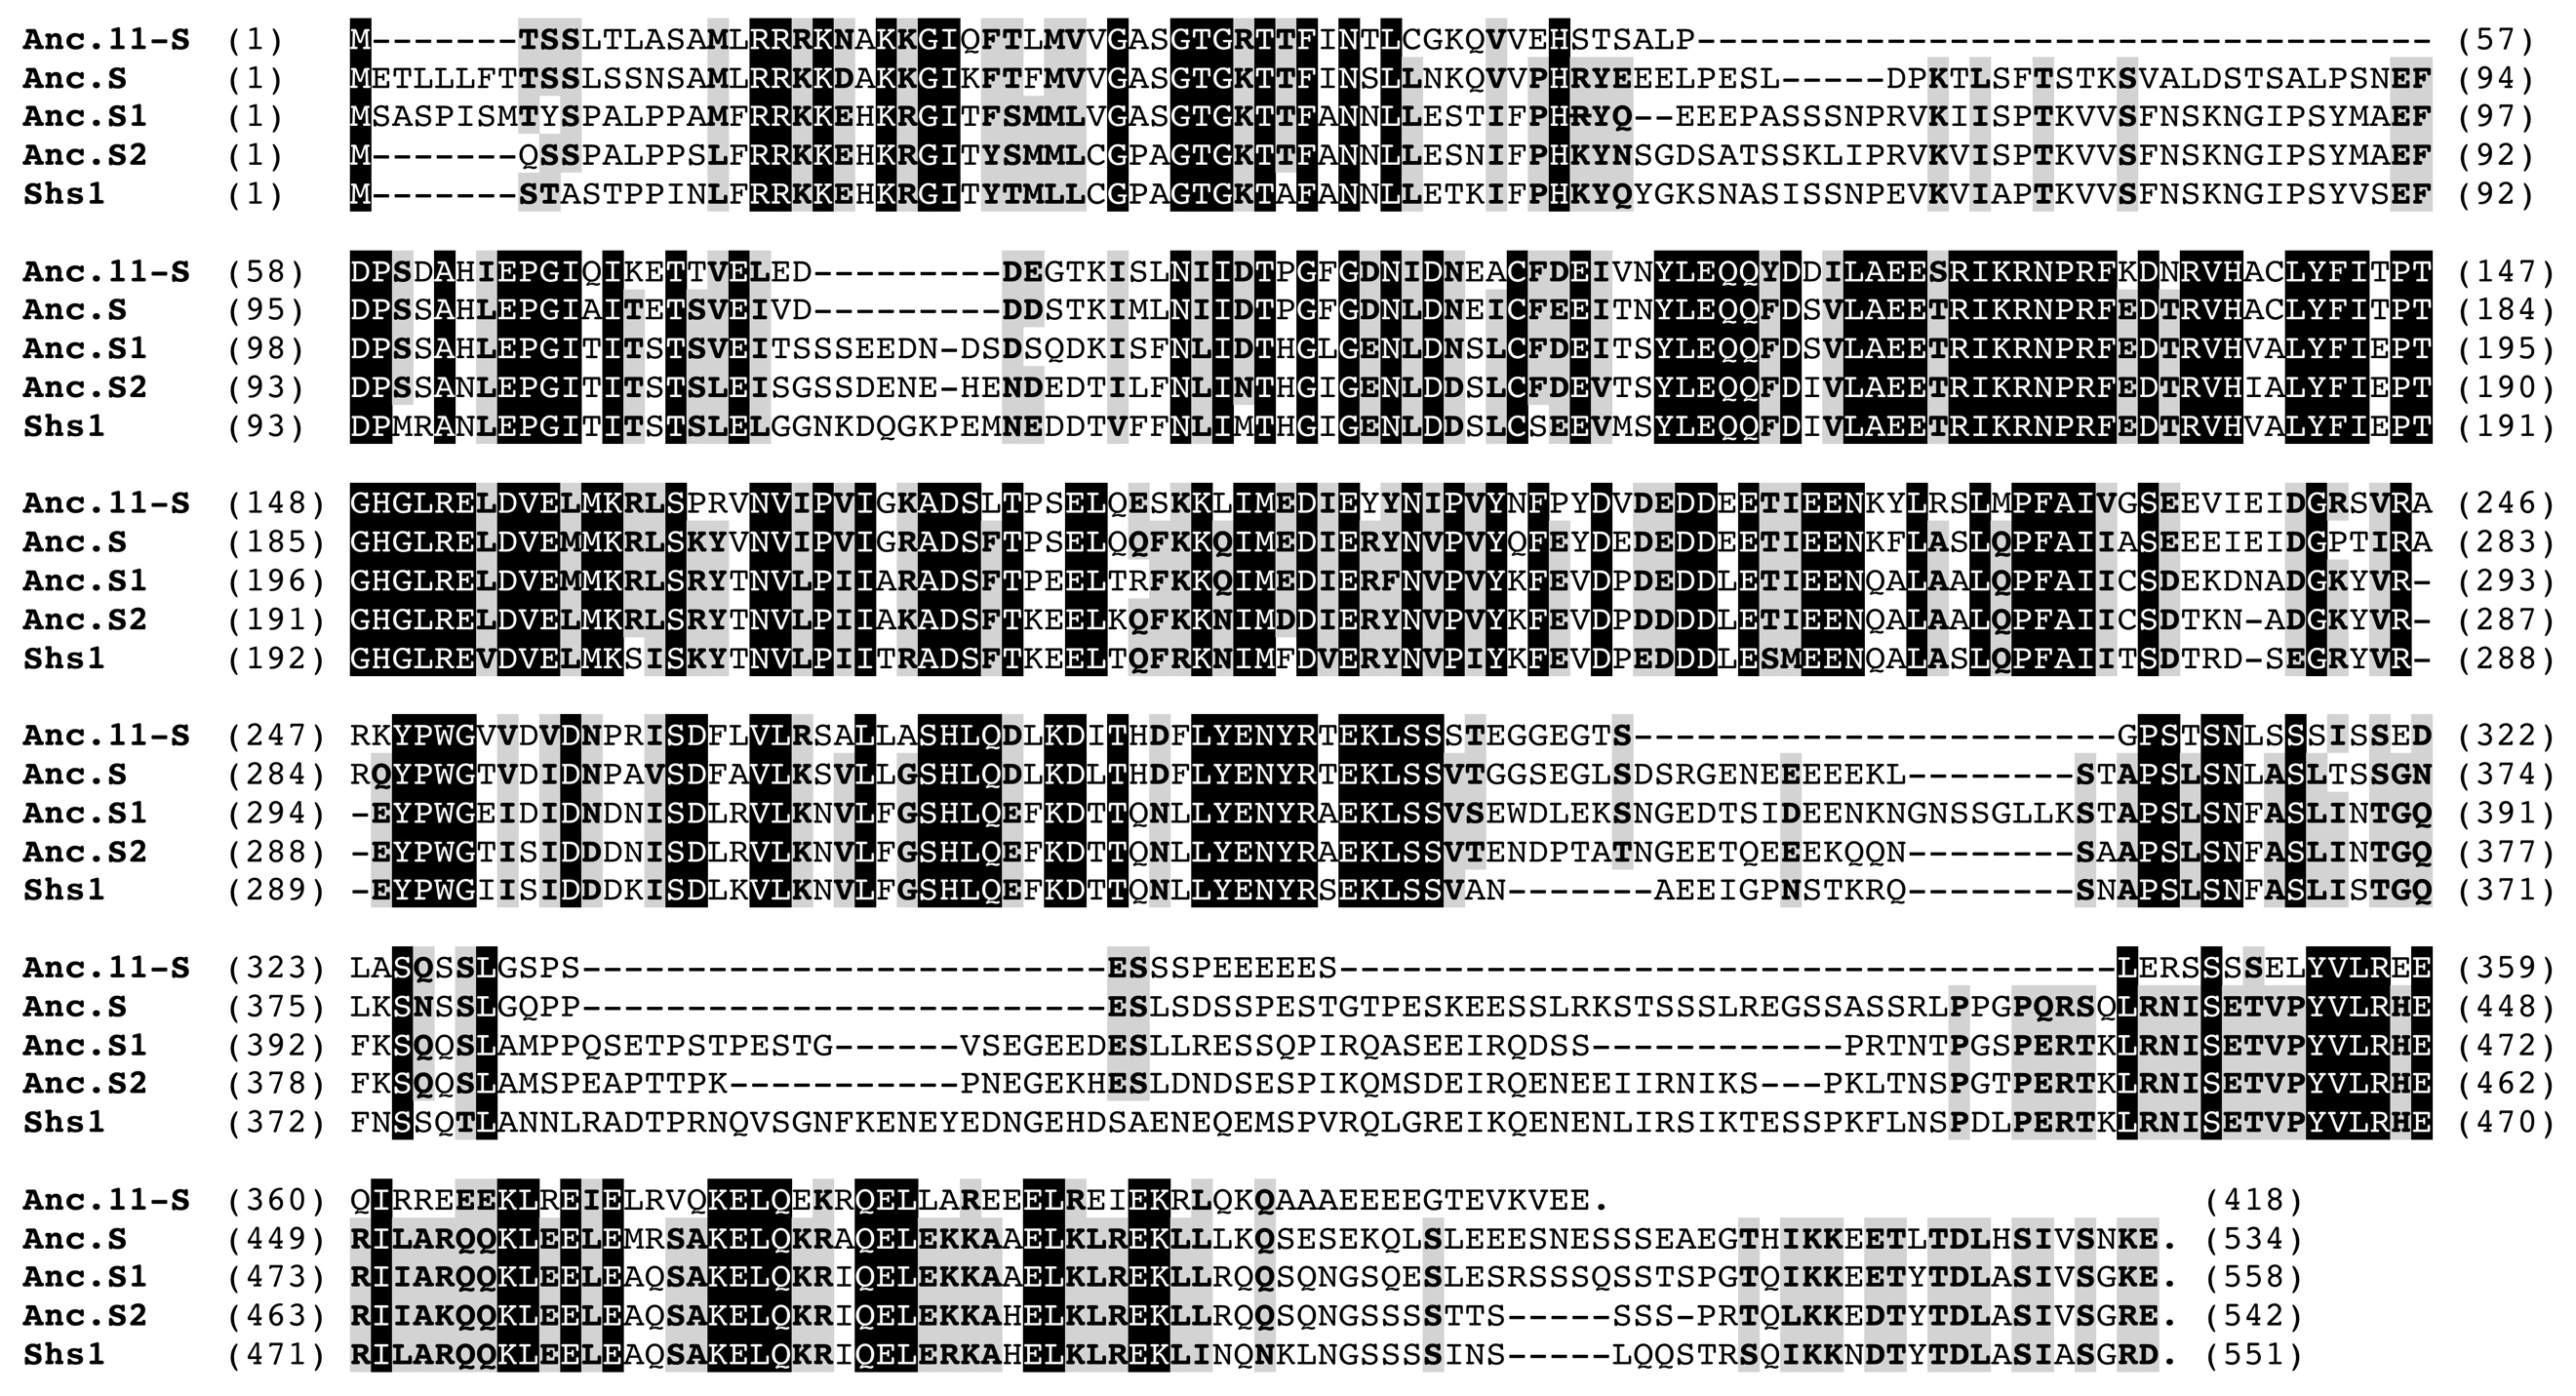
Figure S3.** Comparison of the sequences in the transition from Ancestral 11-S to modern *S.c.*Shs1. Identical residues shared by all five sequences are indicated by a white letter in a black box; identities or standard conservative substitutions shared by at least four of the sequences are indicated by a bold black letter in a gray box.

**Figure S4**. Posterior probability of ancestral septin protein sequences (MUSCLE). Probability is plotted on the y-axis and the amino acid number is plotted on the x-axis.

**
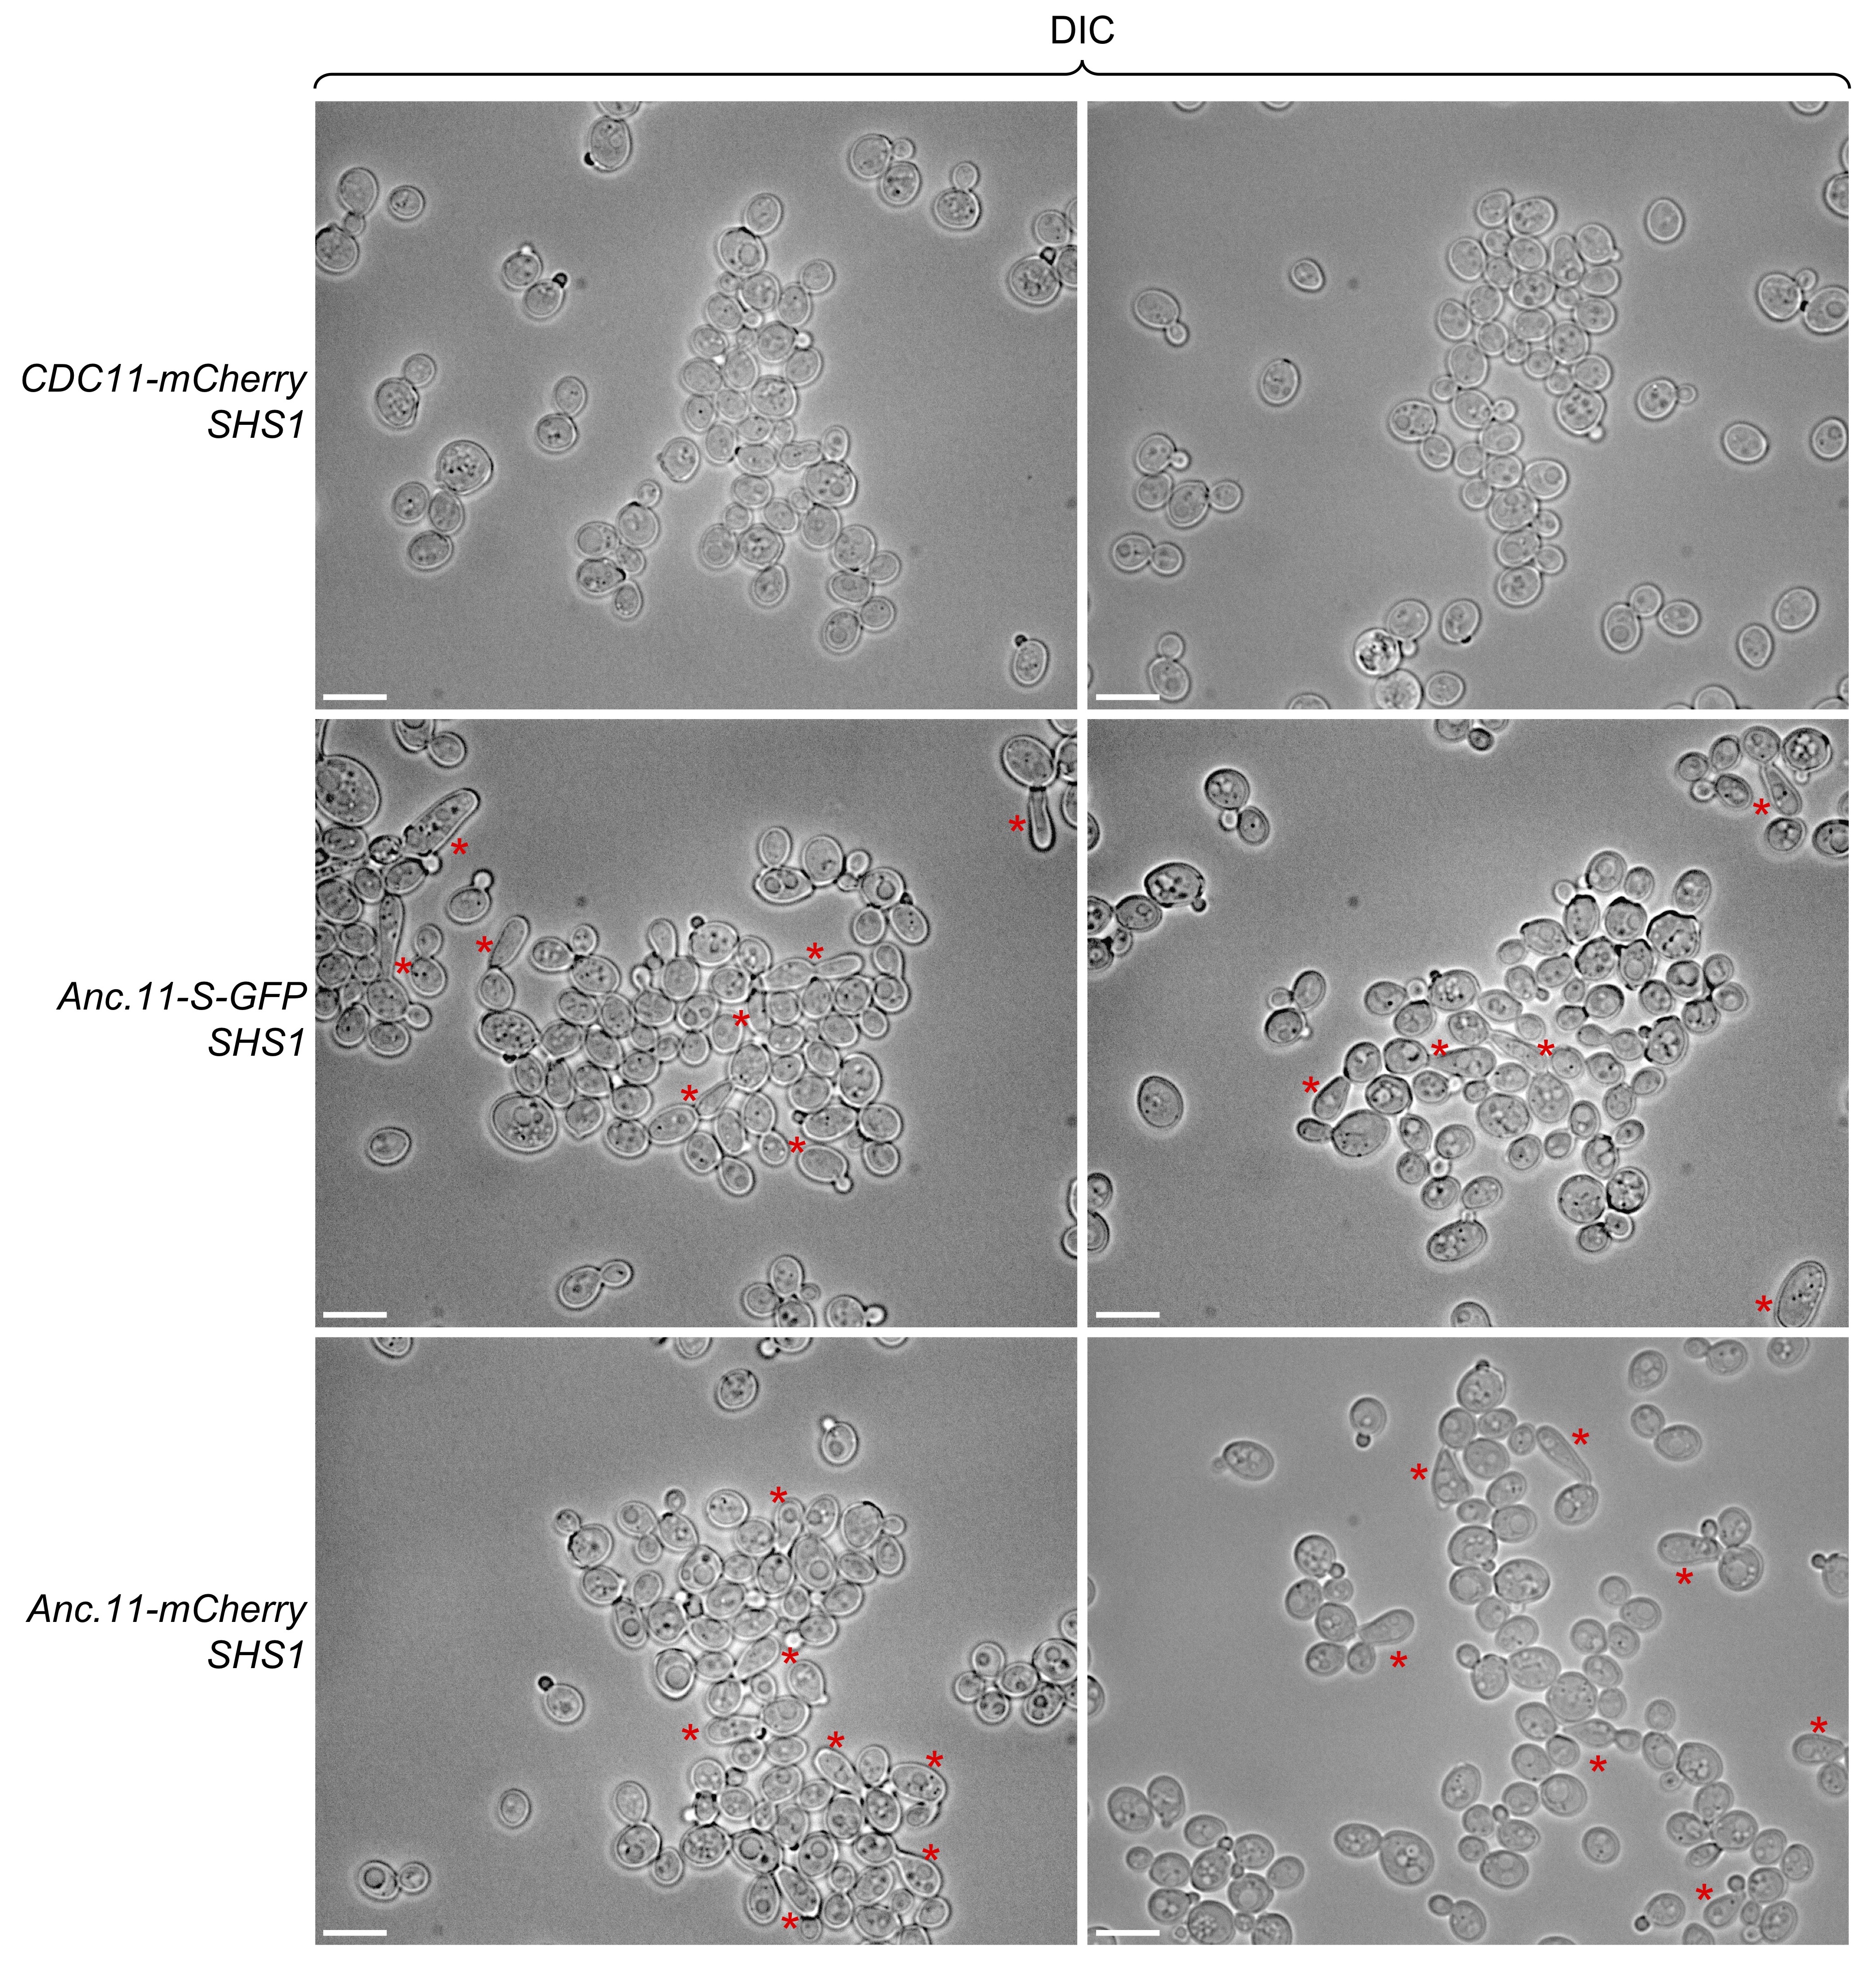
Figure S5.** Cell morphology of yeast expressing reconstructed Anc.11-S or Anc.11 proteins. Strains expressing *CDC11*-mCherry (GFY-58), Anc.11-S-GFP (GFY-479), or Anc.11-mCherry (GFY-481) were selected at least twice on medium containing 5-FOA at 30°C to remove the *URA3*-based covering vector harboring WT *CDC11.* Strains were grown overnight in rich liquid medium at 30°C, back-diluted into YPD culture, and grown for 4 hours. Cells were collected, washed with sterile water, and visualized at room temperature by DIC microscopy. Two representative images are shown for each strain. Images were cropped, and the contrast was adjusted per individual image as a whole for clarity. Red asterisks indicate cells with an elongated morphology. Scale bar, 7.5 μm.

**
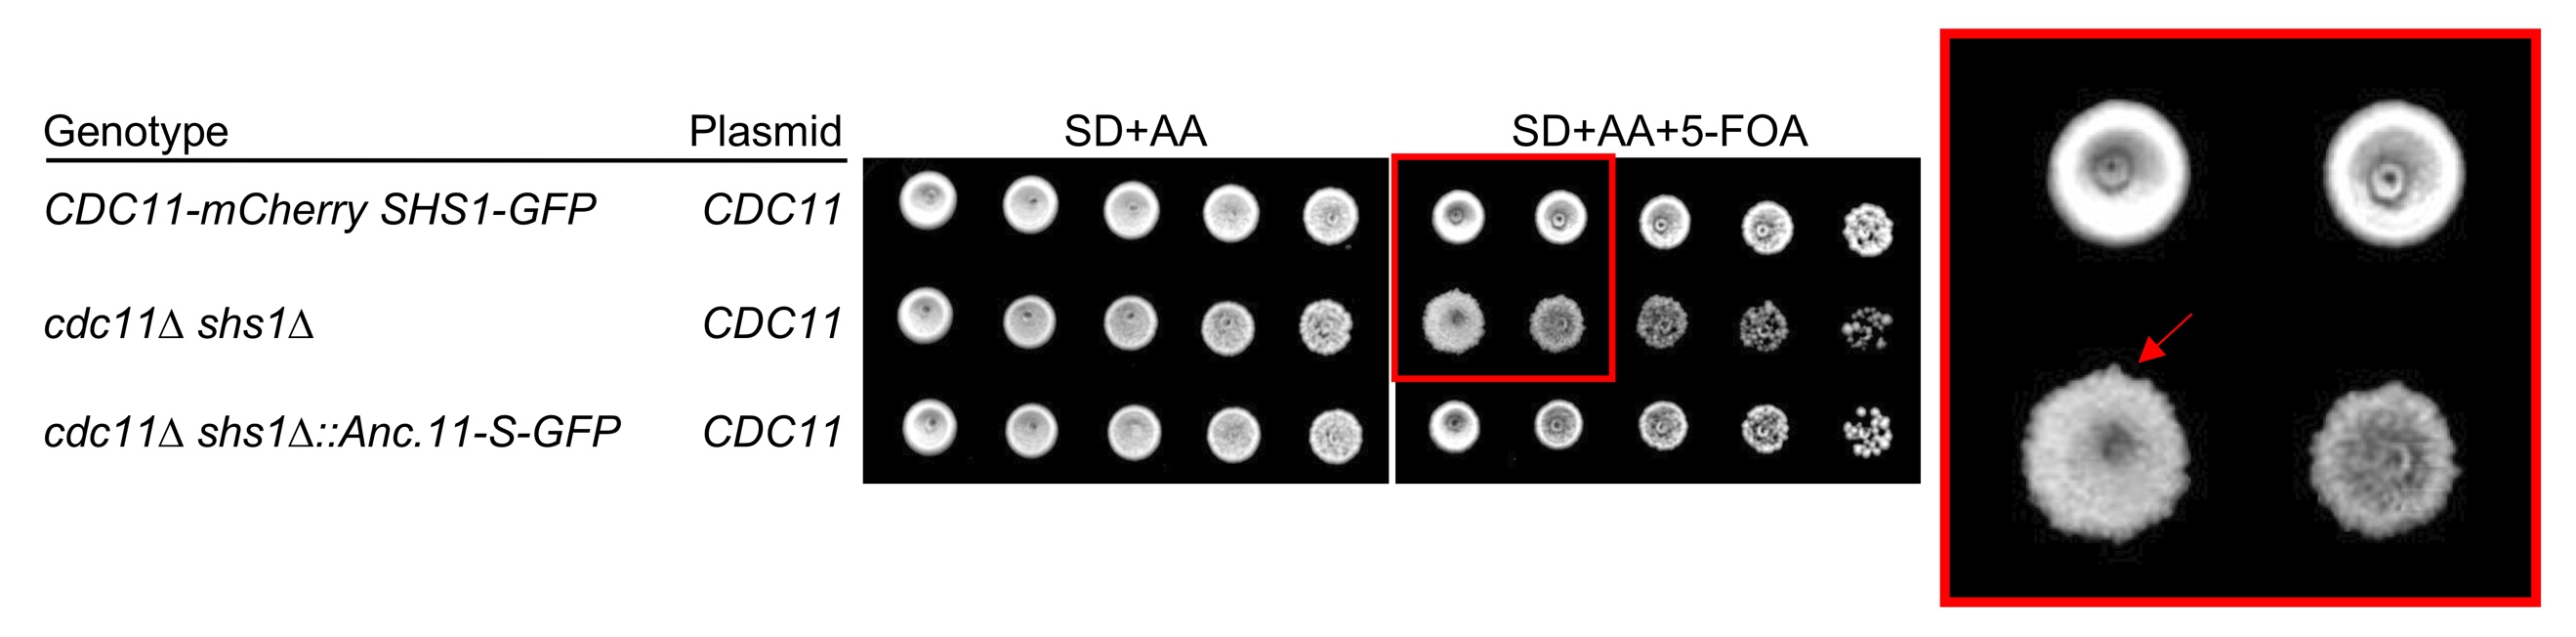
Figure S6**. Morphology of *cdc11∆ shs1∆* yeast growth is distinct compared to *CDC11* *SHS1* (WT) yeast. A sample of the growth assays from Fig. 2C was enlarged to illustrate the differences in color, texture, and morphology of the *cdc11∆ shs1∆* strain (*lane 2*; red arrow within insert) versus WT yeast (*lane 1*). Of note, expression of the Anc.11-S septin allows for complementation within the *cdc11∆ shs1∆* background because the spot morphology is similar to WT (*lane 3*).

**
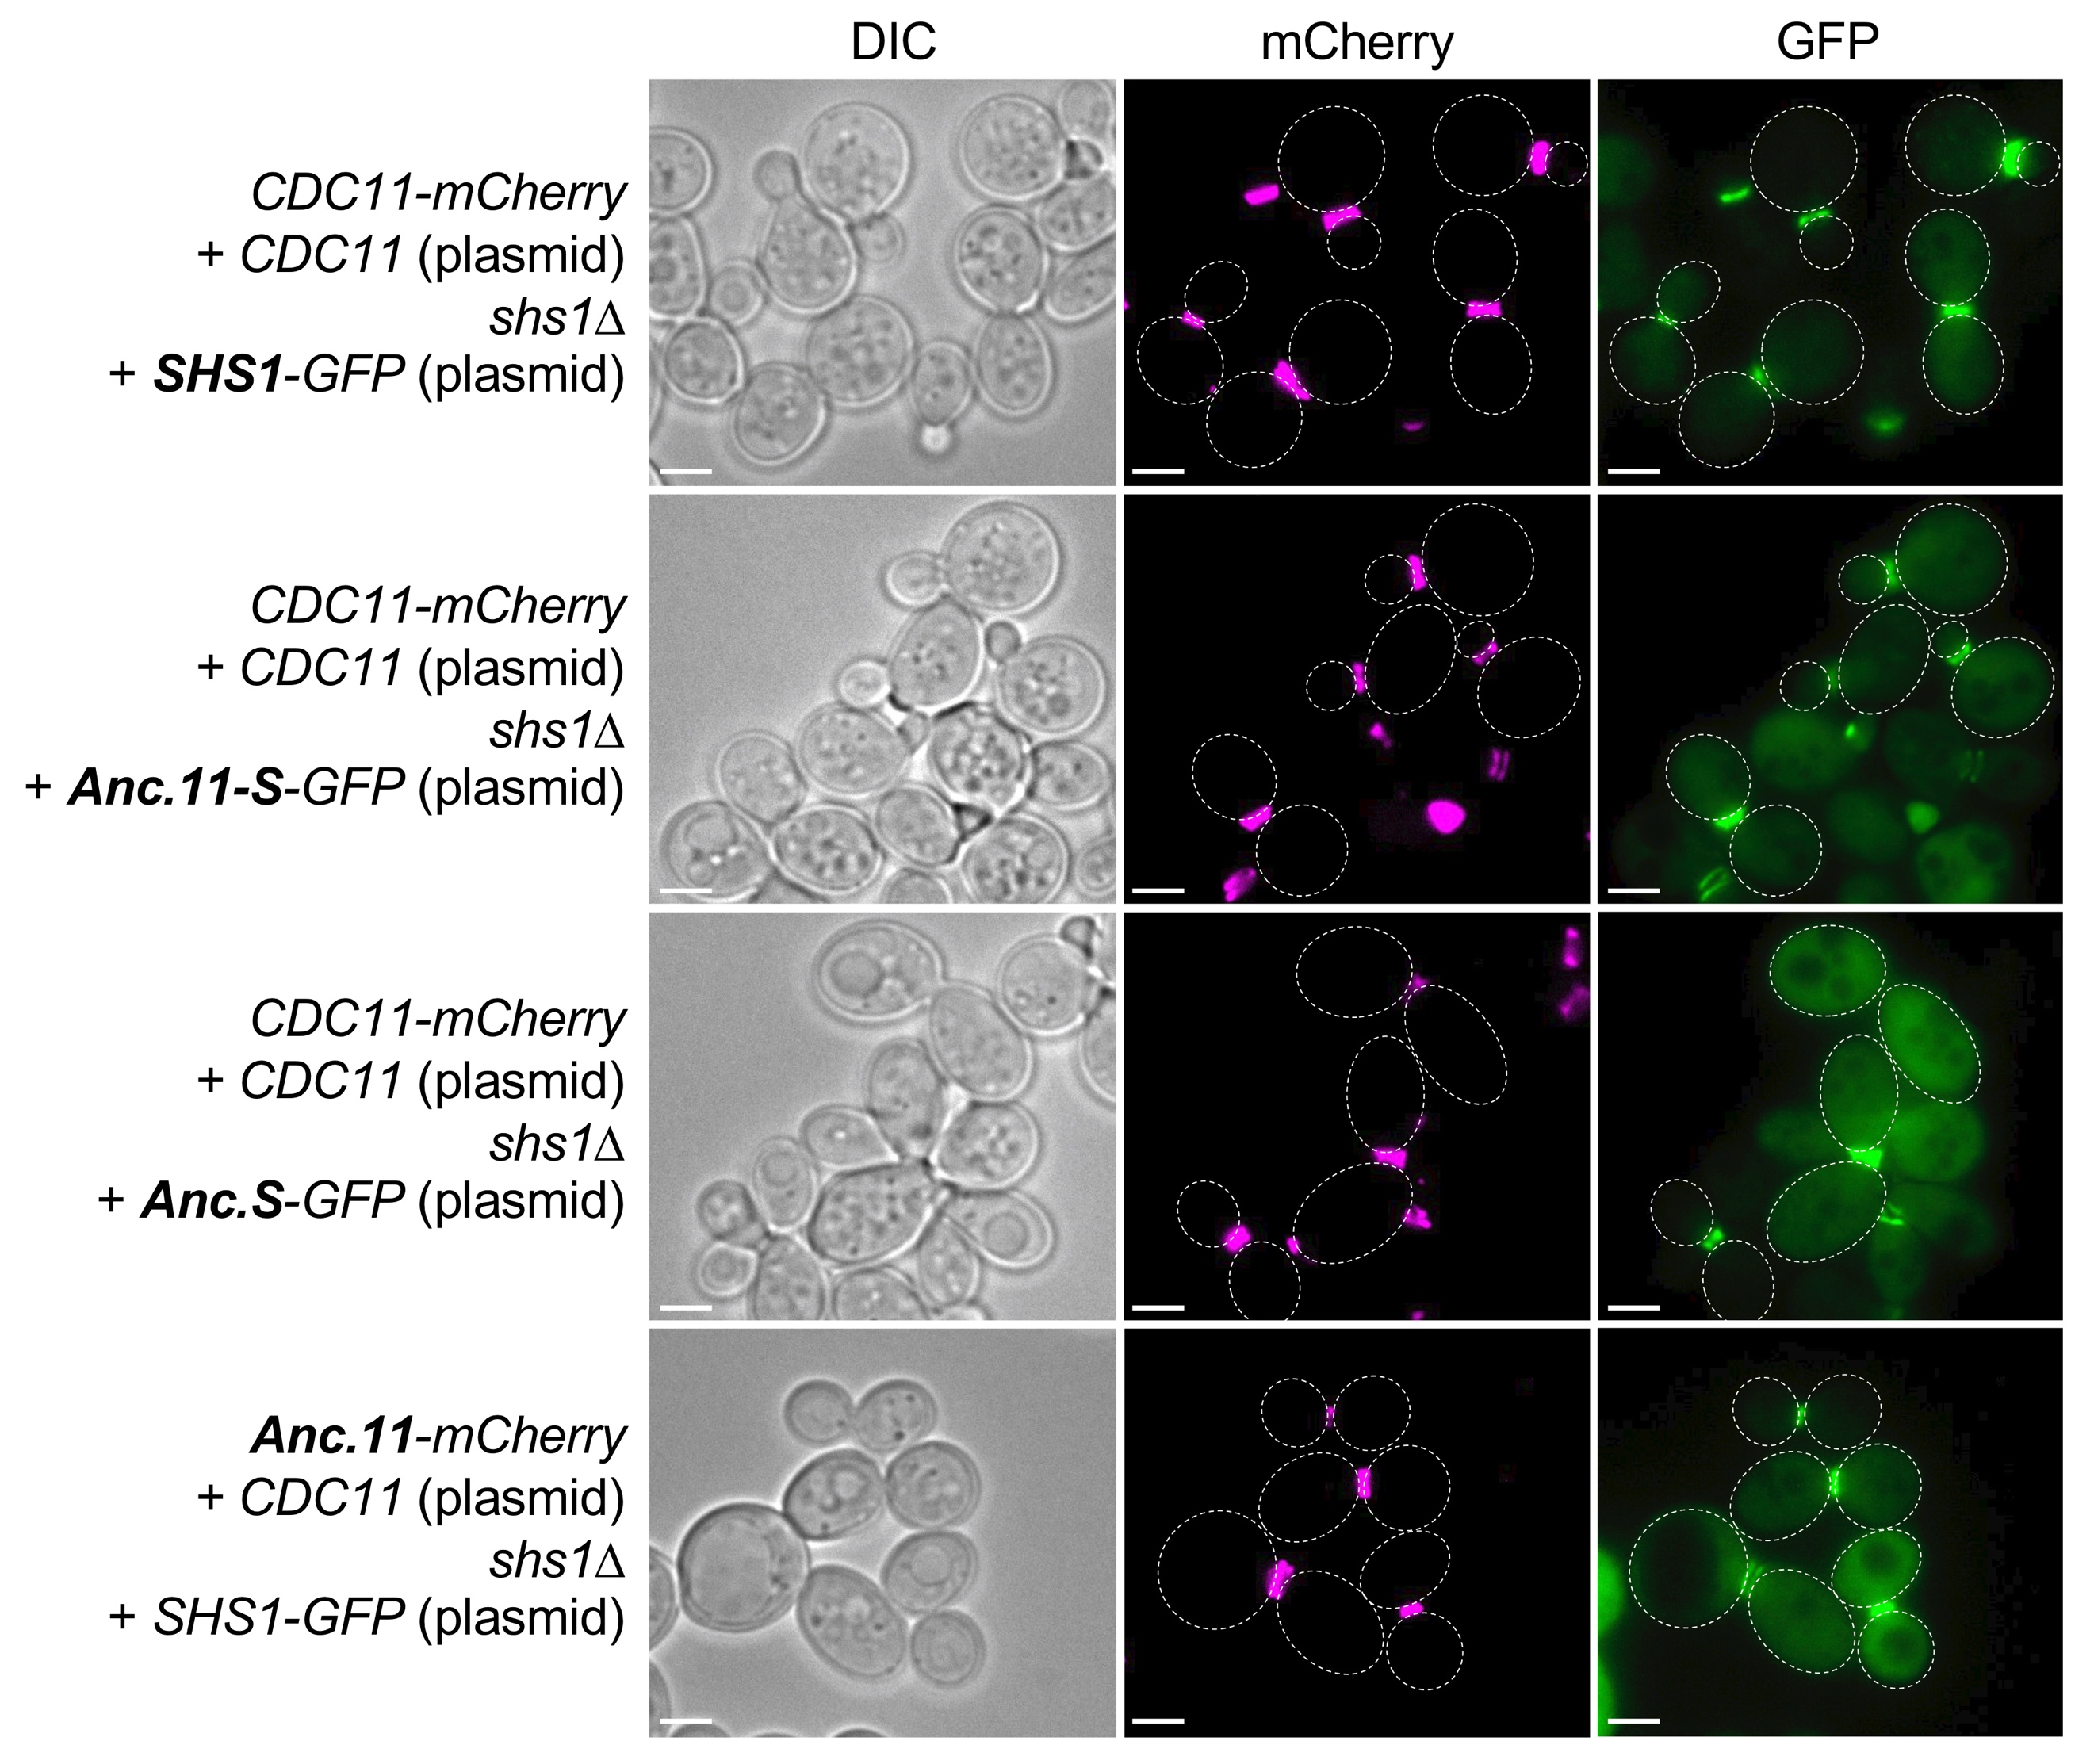
**

**Figure S7**. Visualization of fluorescently tagged ancestral septins in live yeast cells. A yeast strain expressing an endogenous copy of *CDC11* C-terminally tagged with mCherry and lacking *SHS1* (GFY-164) was transformed with *CEN*-based plasmids expressing Shs1-GFP (pGF-preIVL-59), Anc.11-S-GFP (pGF-IVL-159), or Anc.S-GFP (pGF-IVL-168). A separate strain expressing an integrated copy of Anc.11-mCherry at the *CDC11* locus and deleted for *SHS1* (GFY-482) was transformed with a plasmid expressing Shs1-GFP. All strains also contained a *URA3*-based covering plasmid expressing WT *CDC11*. Yeast were grown overnight in SD-URA-LEU medium, back-diluted into YPD, and cultured for 4.5 h at 30°C. Cells were harvested, washed with water, and visualized within 30 minutes by fluorescence microscopy. White dotted lines indicate the periphery of sampled cells. Representative images are shown. Images for each channel were cropped, and the contrast was adjusted per individual image as a whole. Faint dotted white lines demarcate the cell periphery. Scale bar, 3 μm.

**
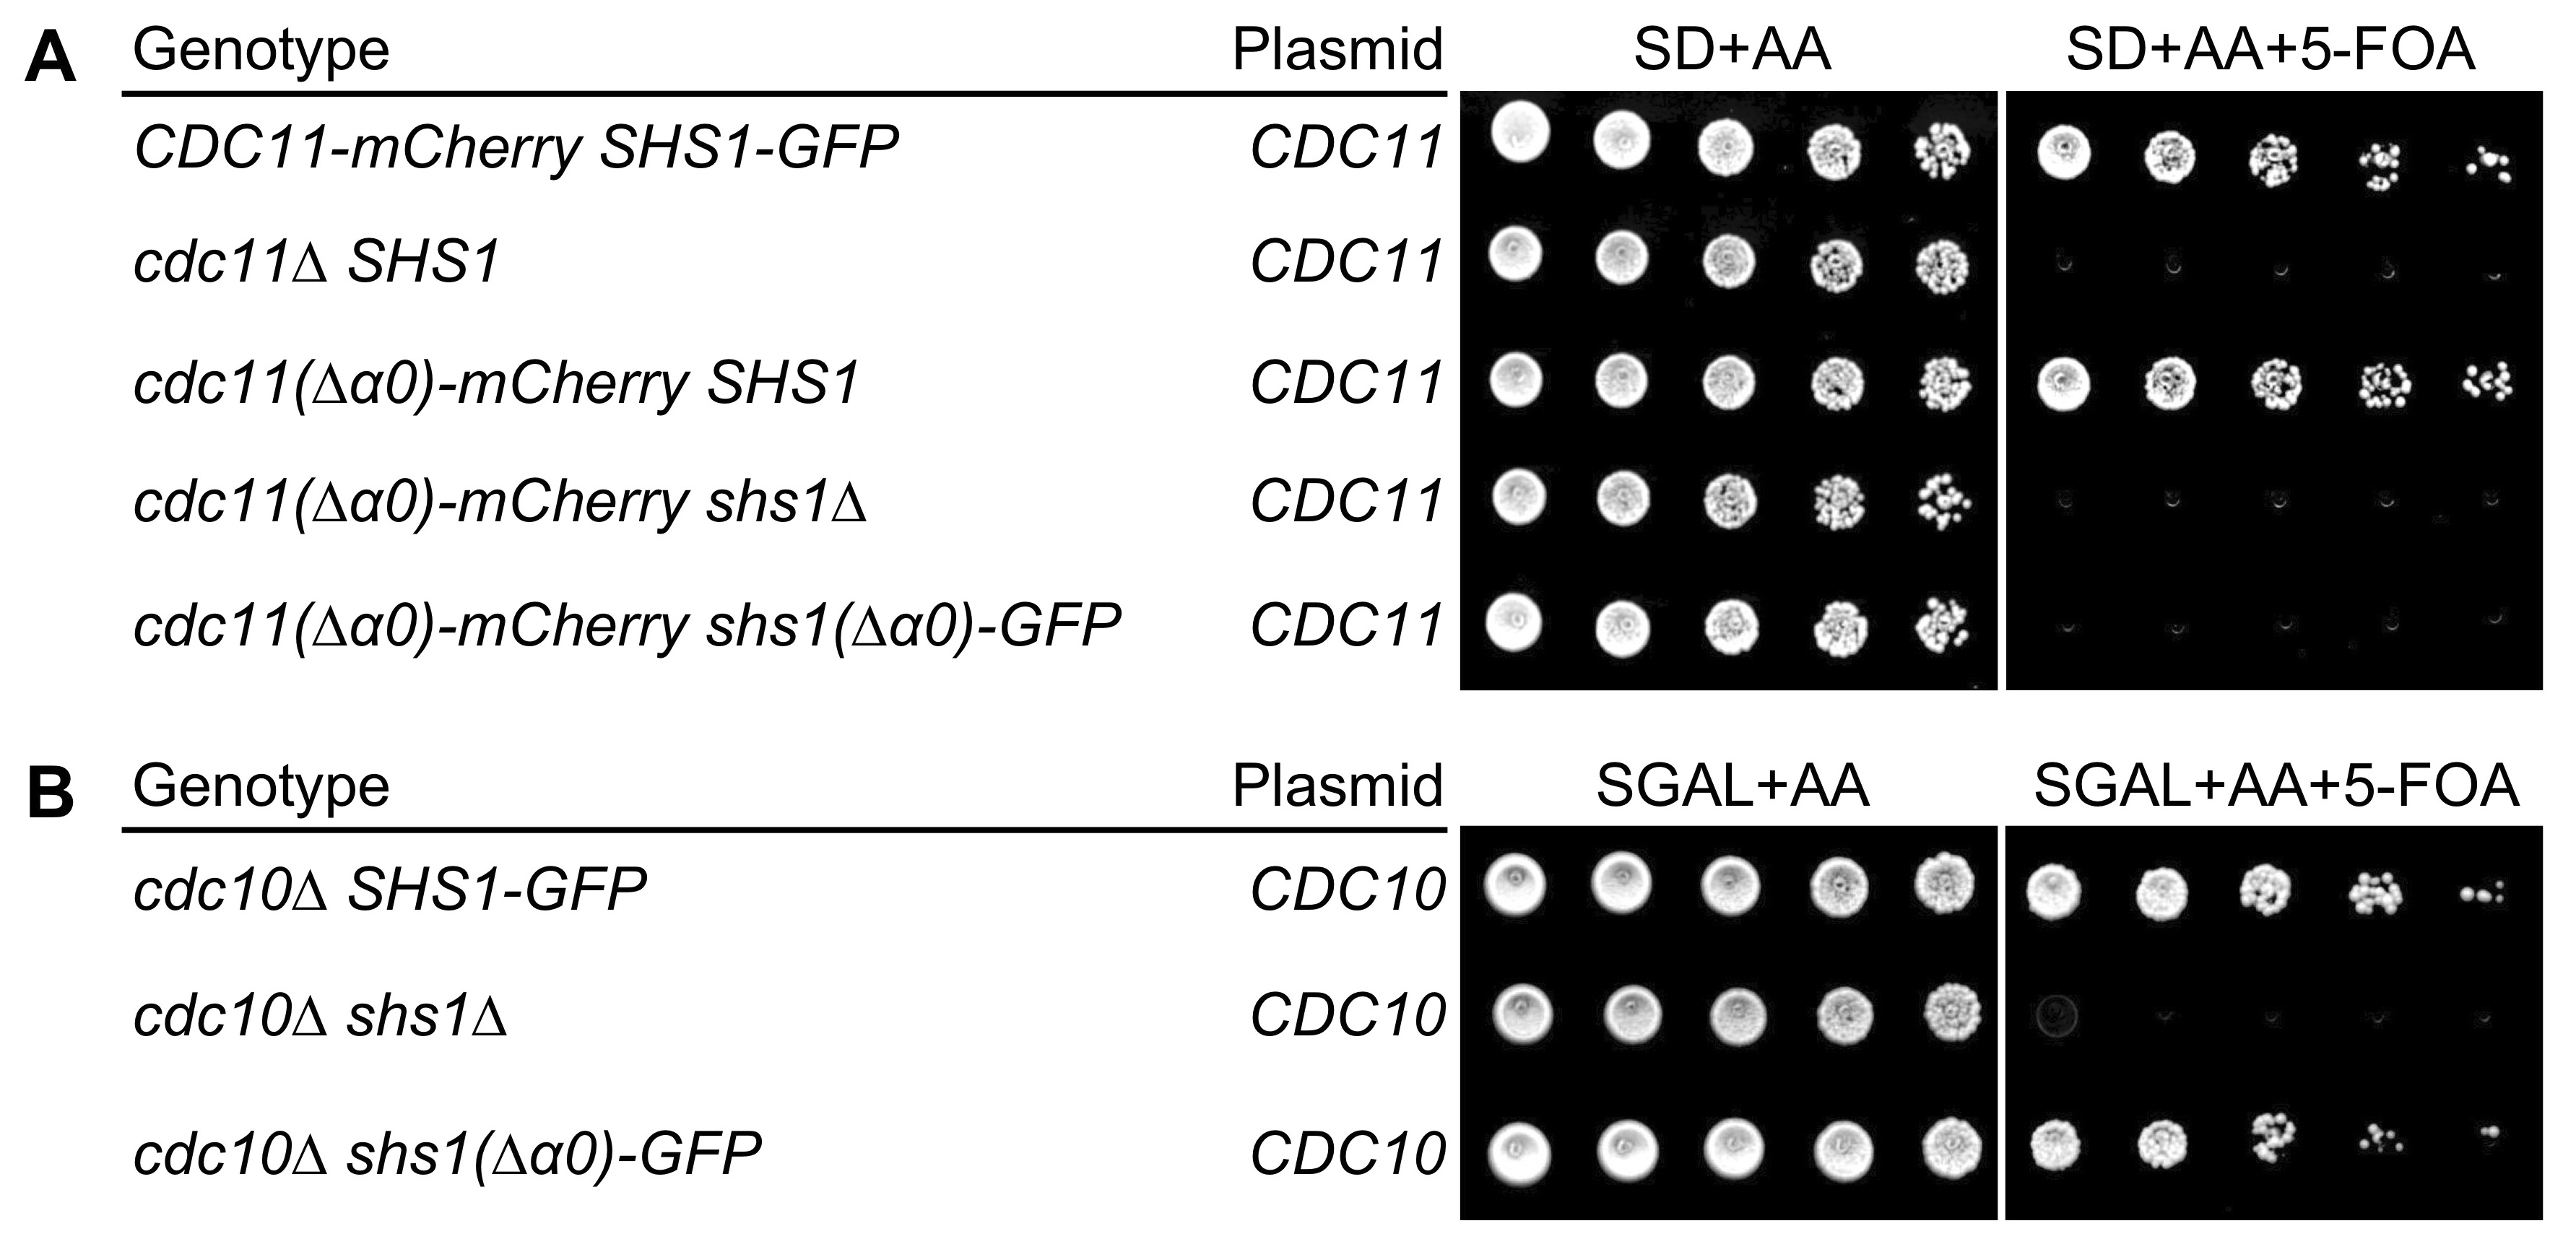
**

**Figure S8**. Growth assays of budding yeast strains expressing septin subunits lacking the α0 domain. (A) Strains GFY-160, GFY-153, GFY-123, GFY-165, and GFY-161 (all initially harboring a *URA3*-marked covering plasmid expressing WT *CDC11*) were cultured overnight in SD-URA medium at 30°C, serial diluted, spotted onto on agar plates of SD medium in the absence and presence of 5-FOA, as indicated, and incubated for 2 days prior to imaging. Lack of the Cdc11 α0 domain is tolerated in the presence of WT Shs1. Deletion of the Shs1 α0 domain or loss of the entire Shs1 subunit renders cells inviable. (B) Strains GFY-87, GFY-137, and GFY-93 (all initially harboring a *URA3*-marked covering plasmid expressing WT *CDC10*) were cultured overnight in YPGAL medium at 25°C, diluted onto agar plates of SGAL medium in the absence and presence of 5-FOA, as indicated, and incubated for 5 days at 25°C prior to imaging. Loss of the α0 segment in Shs1 is tolerated in the presence of WT Cdc11. These data illustrate our previous findings (Finnigan *et al.* 2015) regarding the α0 elements in Cdc11 and Shs1 *in vivo* and thus serve as the basis for testing the ∆α0 alleles of the predicted ancestral septins.

**
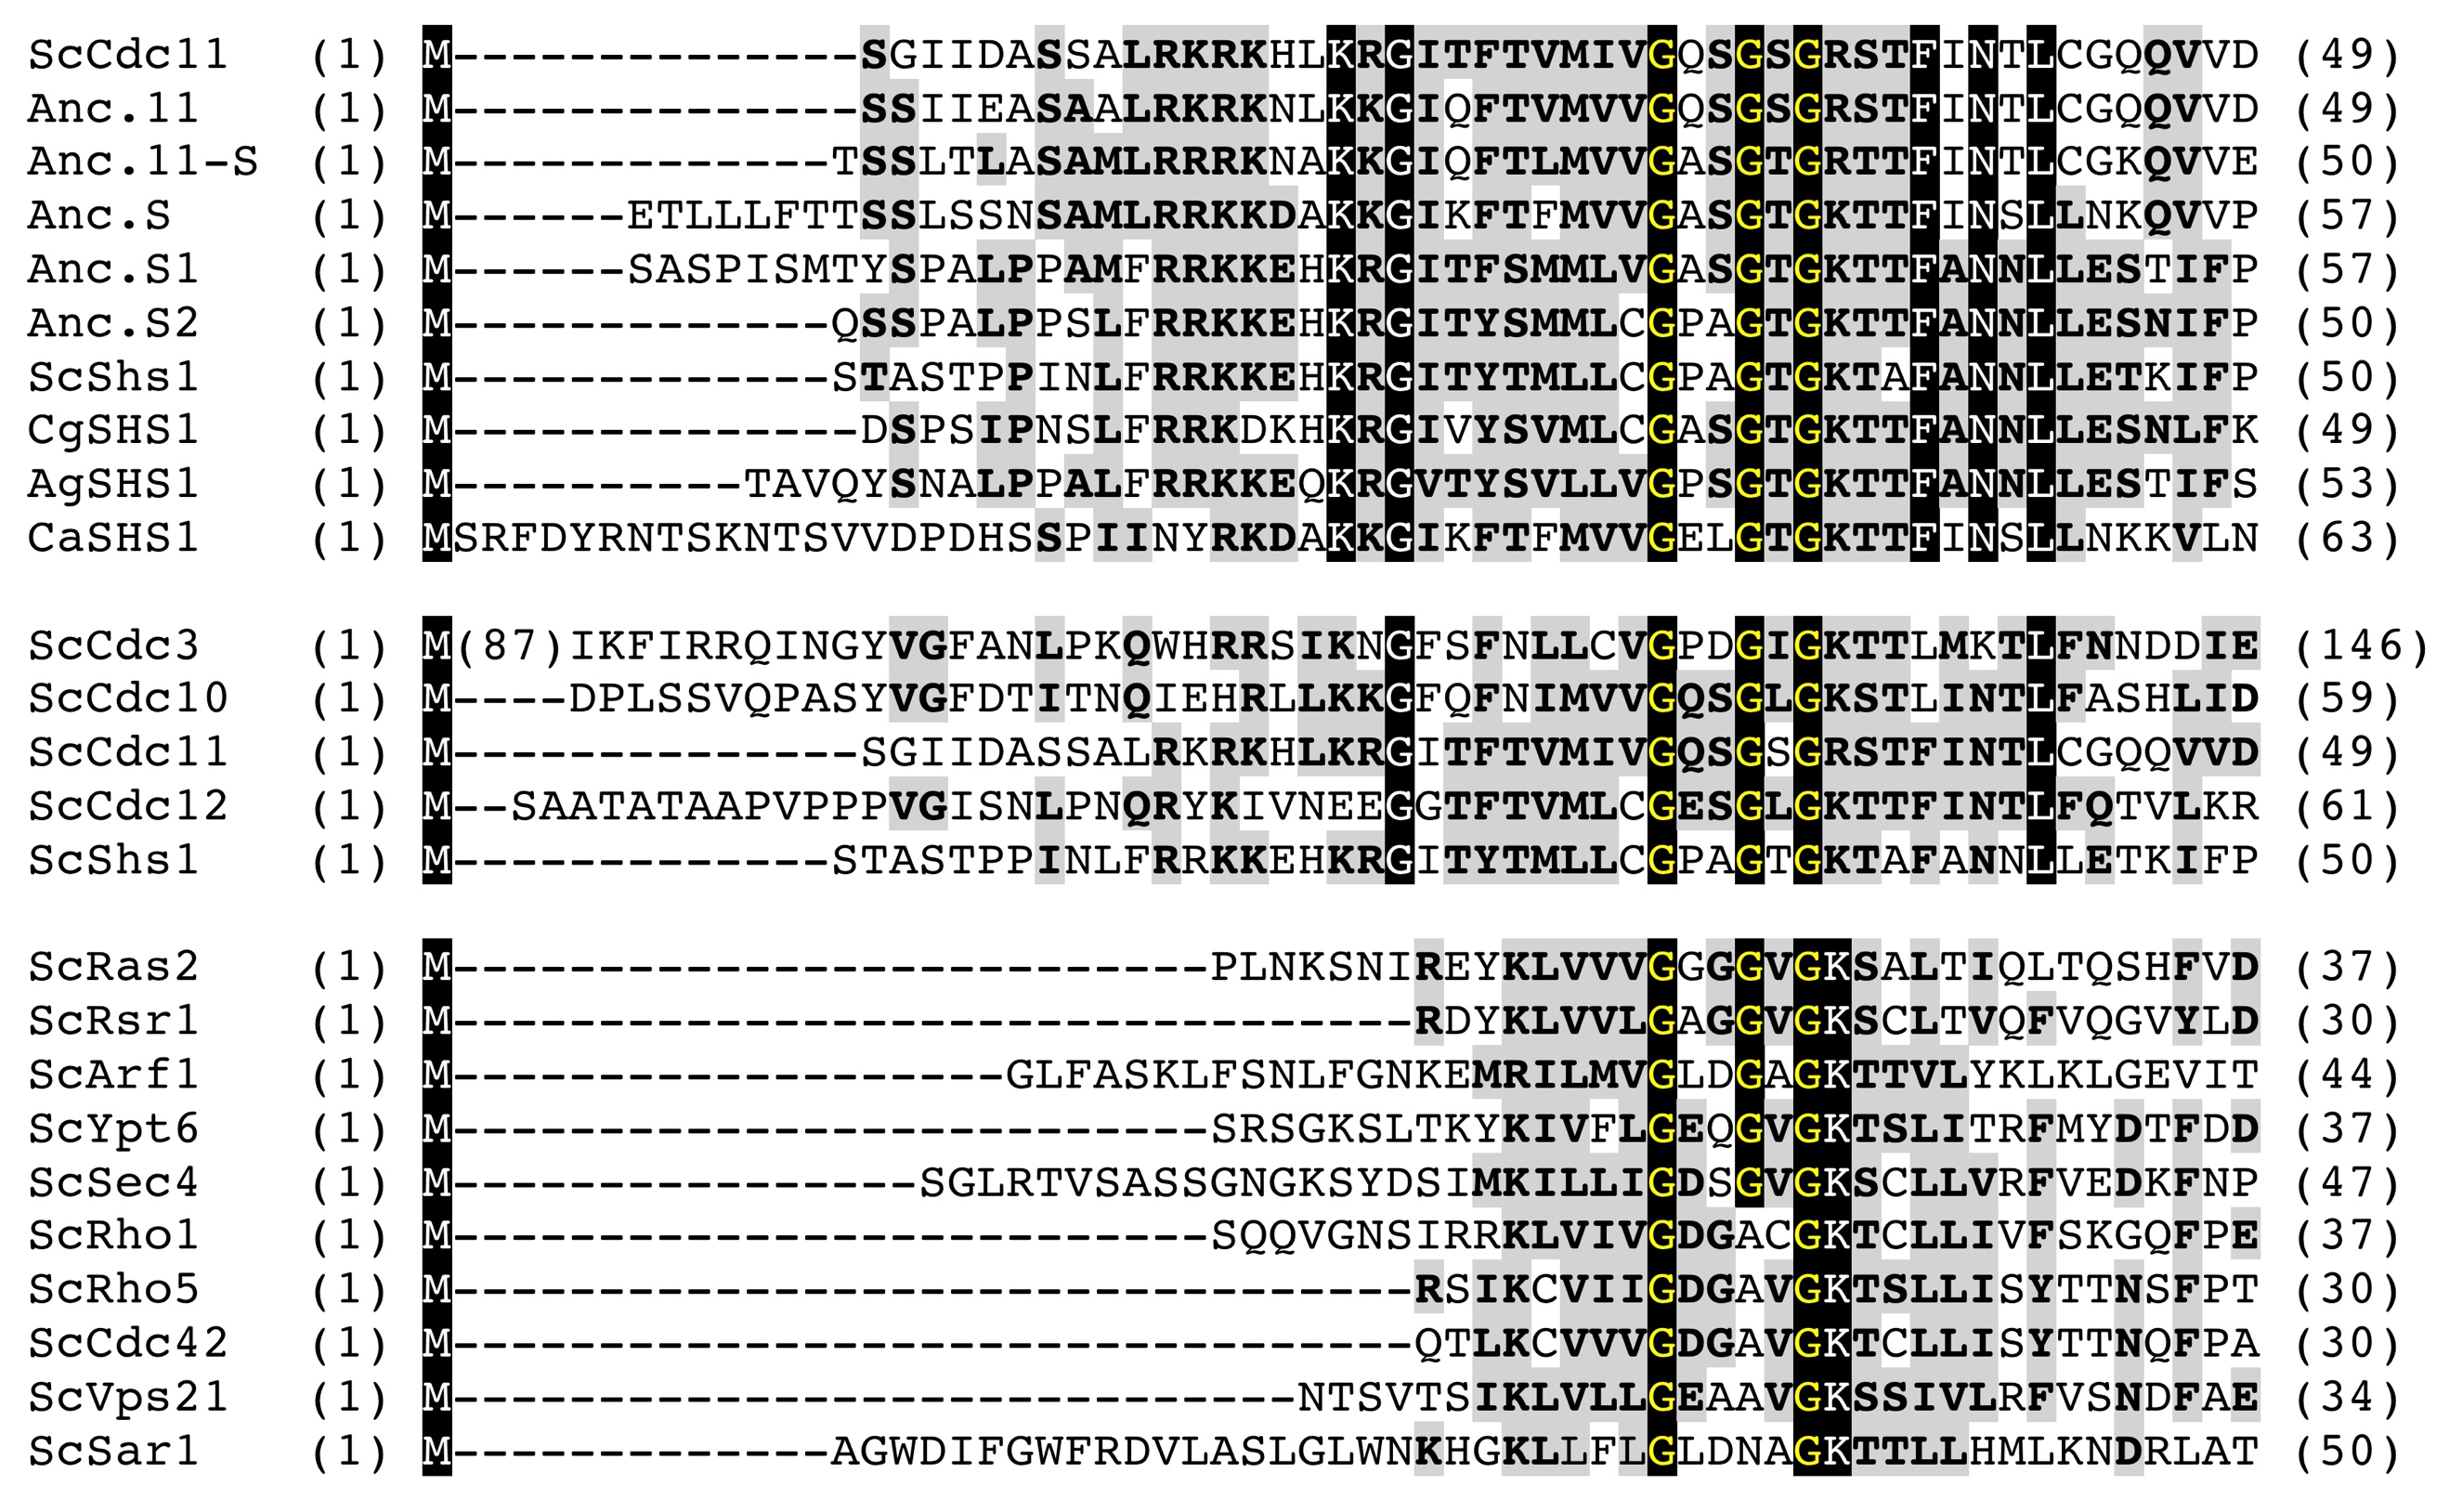
**

**Figure S9**. Multiple sequence alignments of the N-termini and P-loop region of septin subunits and budding yeast small Ras-like GTPases. Protein alignment of the Cdc11 and Shs1 septin subunits, ancestral subunits, and modern paralogs from *C.g*., *A.g*., and *C.a* (*top*). Identical residues are represented by white text over a black box. Identities or standard conservative substitutions shared by at least a majority of the analyzed sequences are indicated by a bold black letter in a gray box. The P-loop glycine residues are indicated with yellow text. Although all yeast mitotic septins (*middle*) maintain all three glycine residues within the P-loop, not all small GTPases do (*bottom*).

**
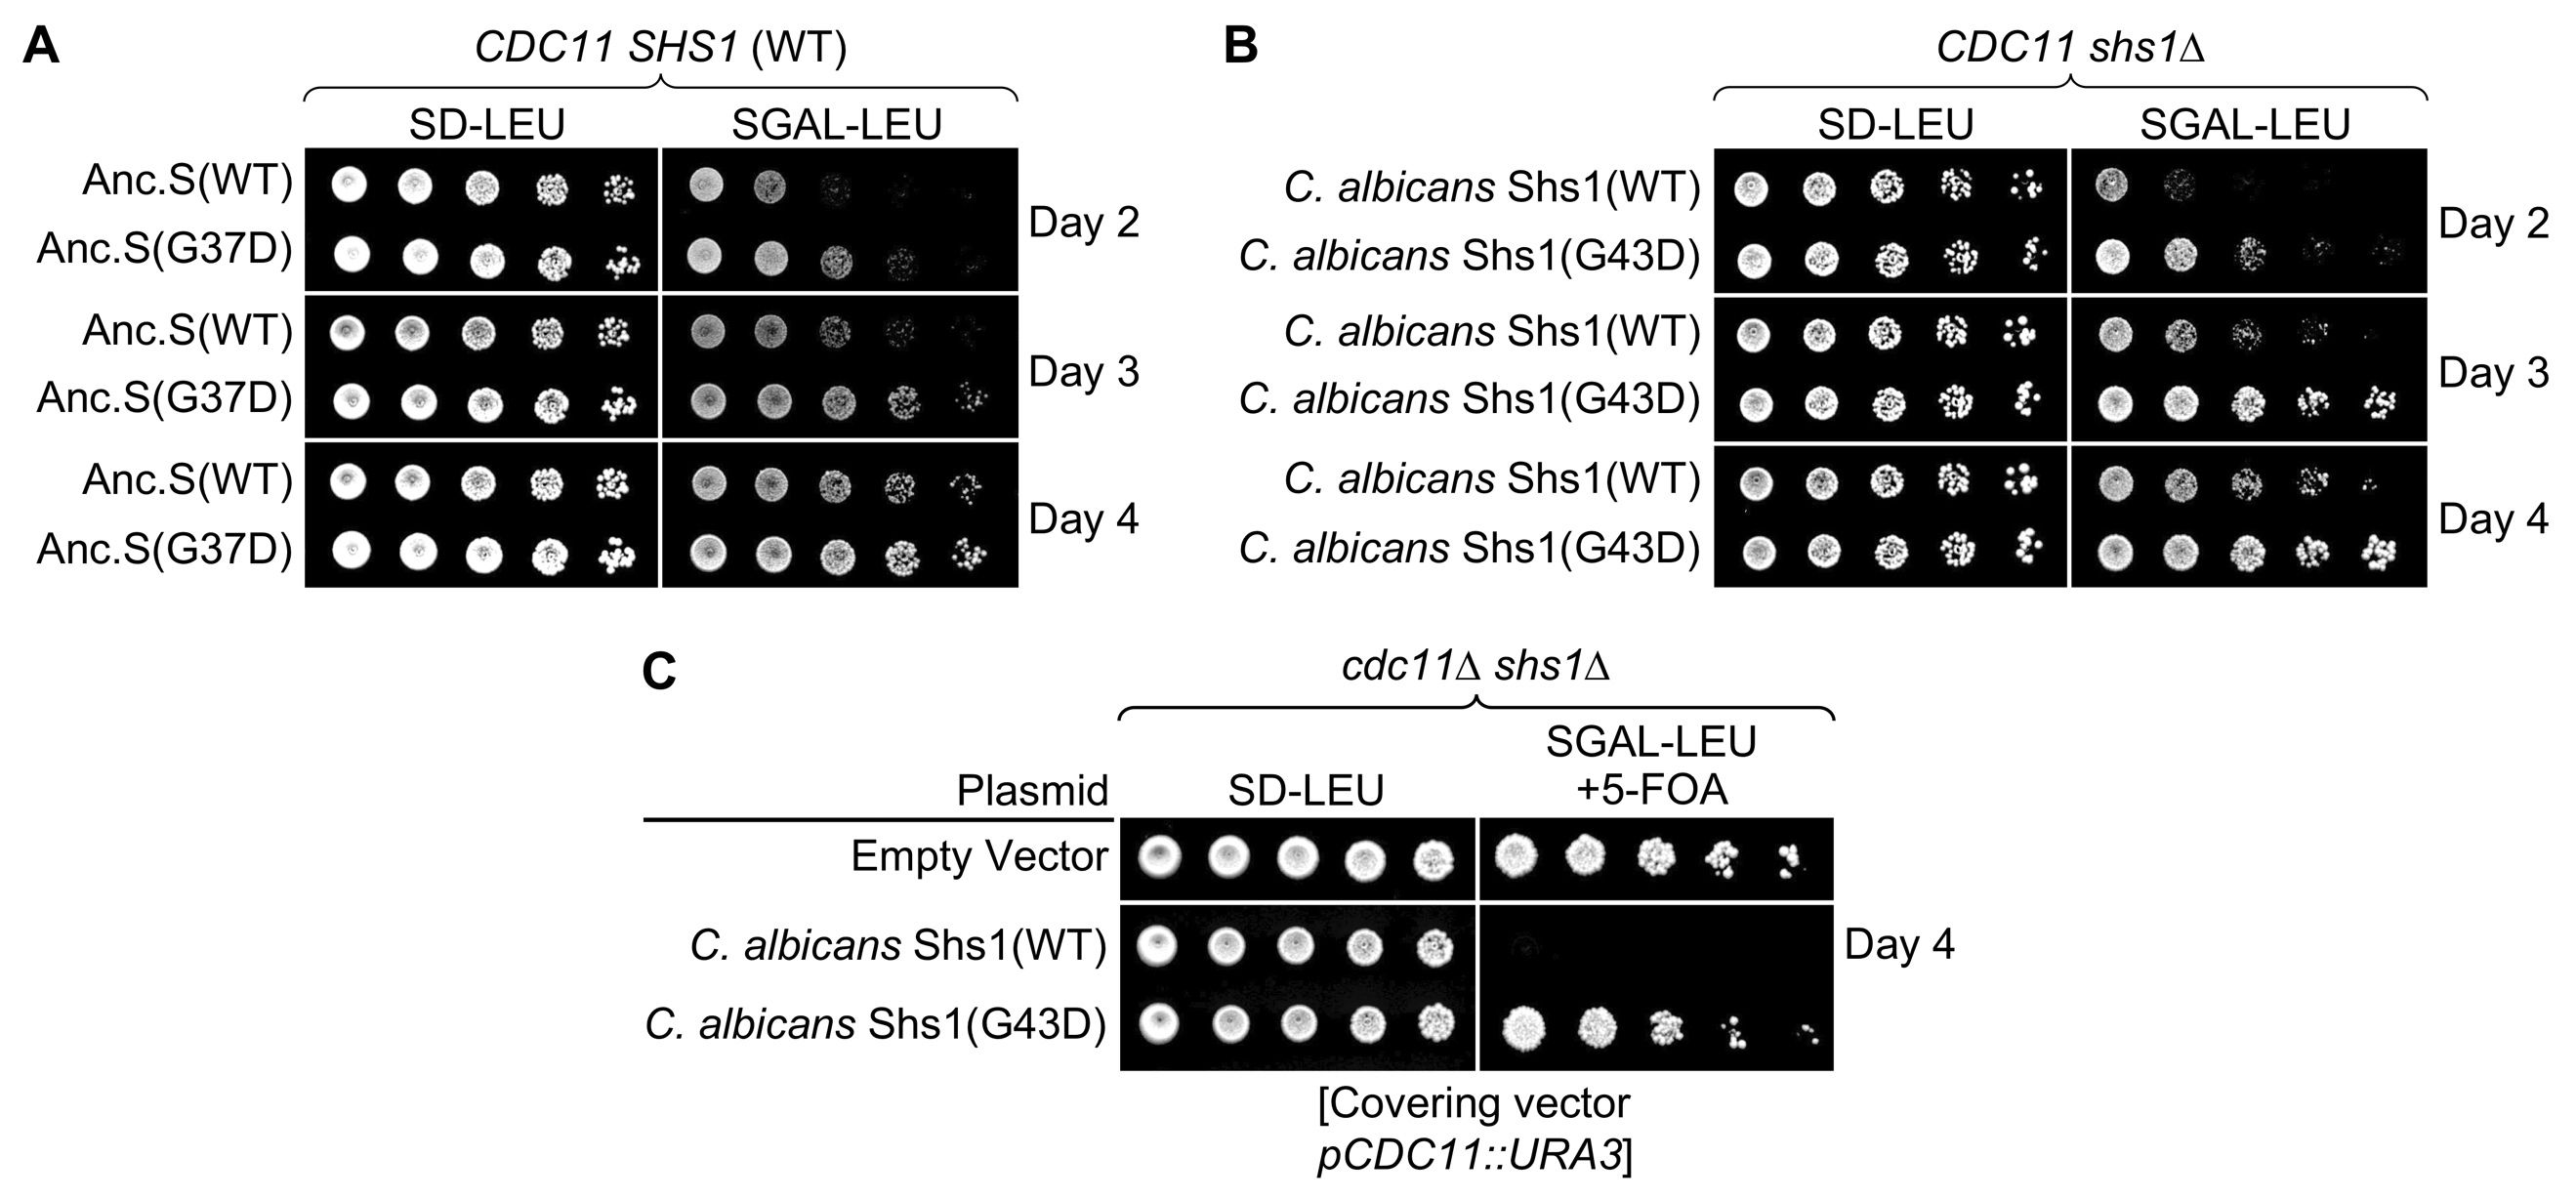
Figure S10**. Expanded growth analysis of overexpressed Anc.S or *C. albicans* subunits. (A) WT yeast (BY4741) harboring CEN-based (*LEU2*) plasmids expressing either Anc.S-GFP or Anc.S(G37D)-GFP under control of the *GAL1/10* promoter were grown in synthetic medium overnight containing raffinose and sucrose at 30°C. Strains were diluted 5-fold onto SD-LEU or SGAL-LEU plates and incubated for 4 days at 30°C. Images were obtained at 24 h time points along with controls (not shown). (B) *shs1∆* yeast (GFY-38) were transformed with plasmids overexpressing *C. albicans* Shs1 or a G43D variant, pre-induced overnight, spotted onto plates, and imaged as in (A). In both cases, there is a modest, but reproducible growth difference between overexpression of the WT or mutant variant that is more apparent at earlier time points. (C) Yeast deleted for both *CDC11* and *SHS1* (GFY-163) were transformed with an empty vector control (pRS315) or plasmids expressing the *C. albicans SHS1* subunit or a mutant variant (G43D). Strains also contained a *URA3*-based covering vector expressing WT *CDC11*. Yeast were cultured overnight in medium containing raffinose and sucrose (lacking uracil and leucine), spotted onto SD-LEU and SGAL-LEU+5-FOA, incubated at 30°C, and imaged after 4 days. **REFERENCES**

Finnigan, G. C., J. Takagi, C. Cho and J. Thorner, 2015 Comprehensive genetic analysis of paralogous terminal septin subunits Shs1 and Cdc11 in *Saccharomyces* *cerevisiae*. Genetics 200**:** 821-841.
